# Supplementary material for: Chemically pre-lithiated/sodiated reduced graphene oxide–antimony oxide composites for high-rate capability and long-term cycling stability in lithium and sodium-ion batteries
Source: Royal Society of Chemistry journal article supplement (doi:10.1039/d5se00172b), 2025-01-01
Supplement: d5se00172b1.pdf [file d5se00172b1.pdf]

## Electronic Supplementary Information

# Chemically Pre-Lithiated/Sodiated Reduced Graphene Oxide-Antimony Oxide Composites for High-Rate Capability and Long-Term Cycling Stability in Lithium and Sodium-Ion Batteries

*Minseop Lee<sup>a‡</sup>, Gi-Chan Kim<sup>a‡</sup>, and Seung-Min Paek<sup>a\*</sup>*

<sup>a</sup>Department of Chemistry, Kyungpook National University, Daegu 41566, Republic of Korea

\*E-mail: [smpaek@knu.ac.kr](mailto:smpaek@knu.ac.kr)

‡These authors contributed equally.

Supplementary Figs. and Tables.

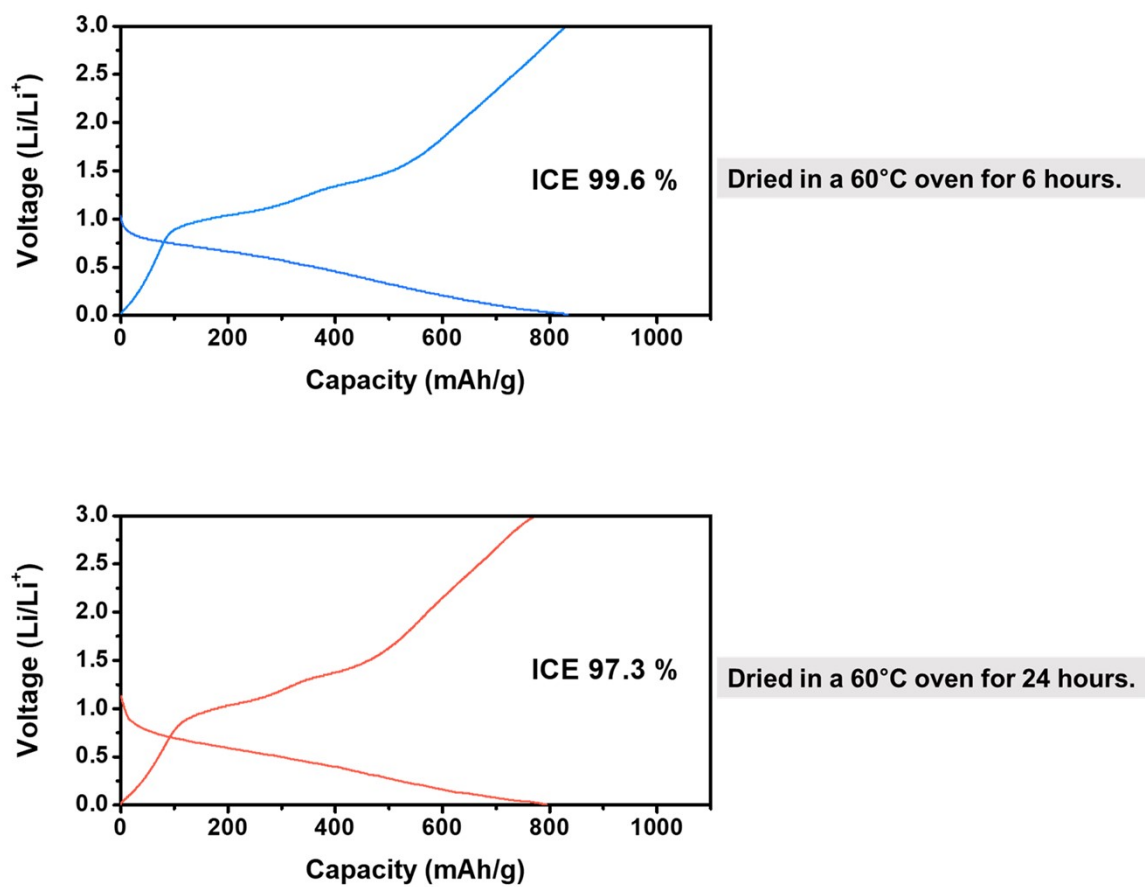

**Fig. S1.** Comparison of initial coulombic efficiency (ICE) of PL-MrGO/Li<sub>x</sub>Sb<sub>2</sub>O<sub>3</sub> electrodes dried at 60°C for different drying times (6 and 24 hours).

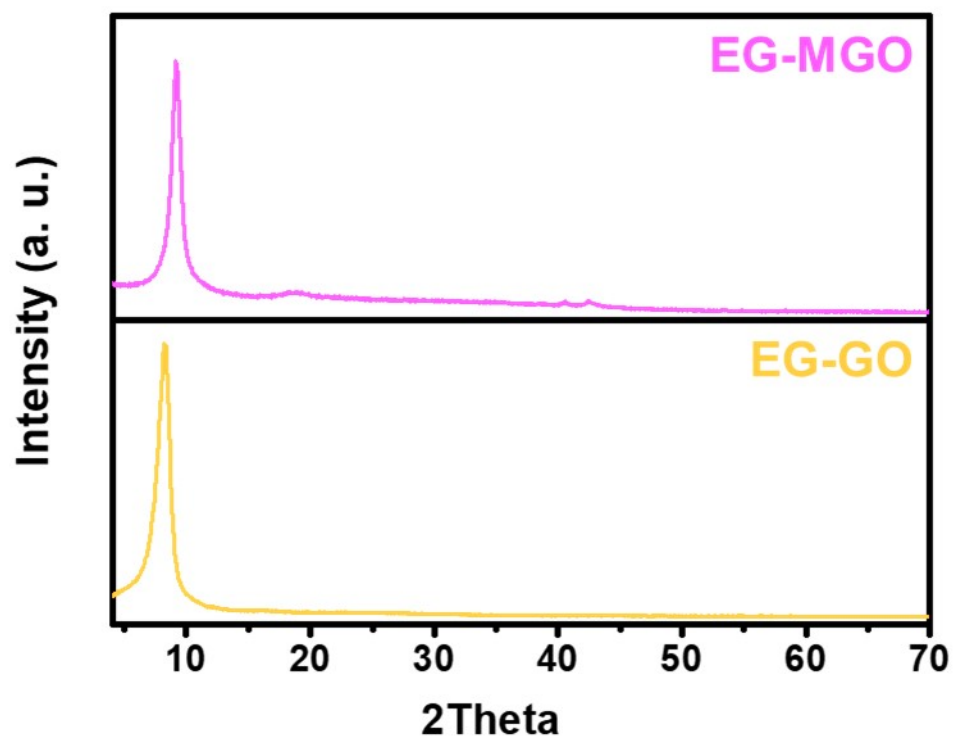

Fig. S2. XRD patterns for EG-GO and EG-MGO.

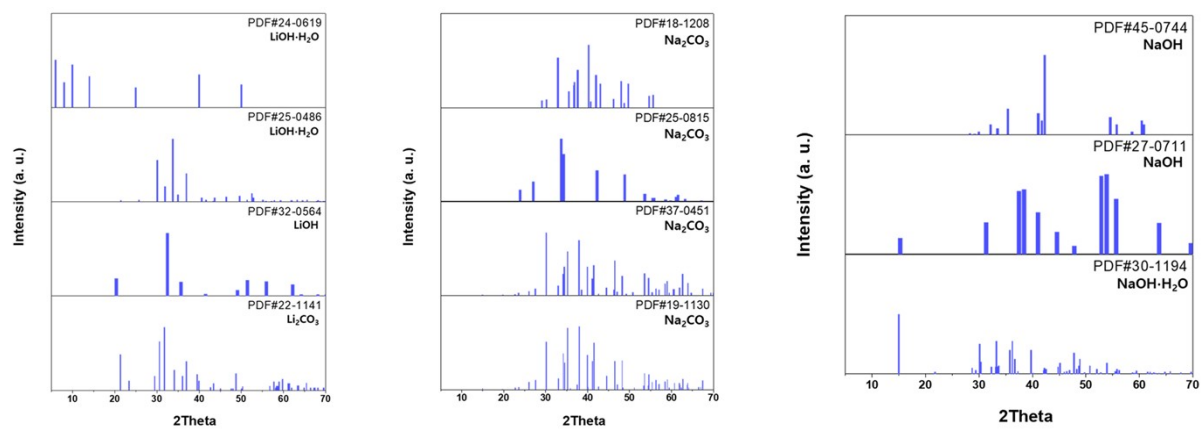

**Fig. S3.** XRD spectra of  $\text{Li}(\text{Na})\text{OH}$  or  $\text{Li}(\text{Na})_2\text{CO}_3$ , as identified from the PDF card (Database).

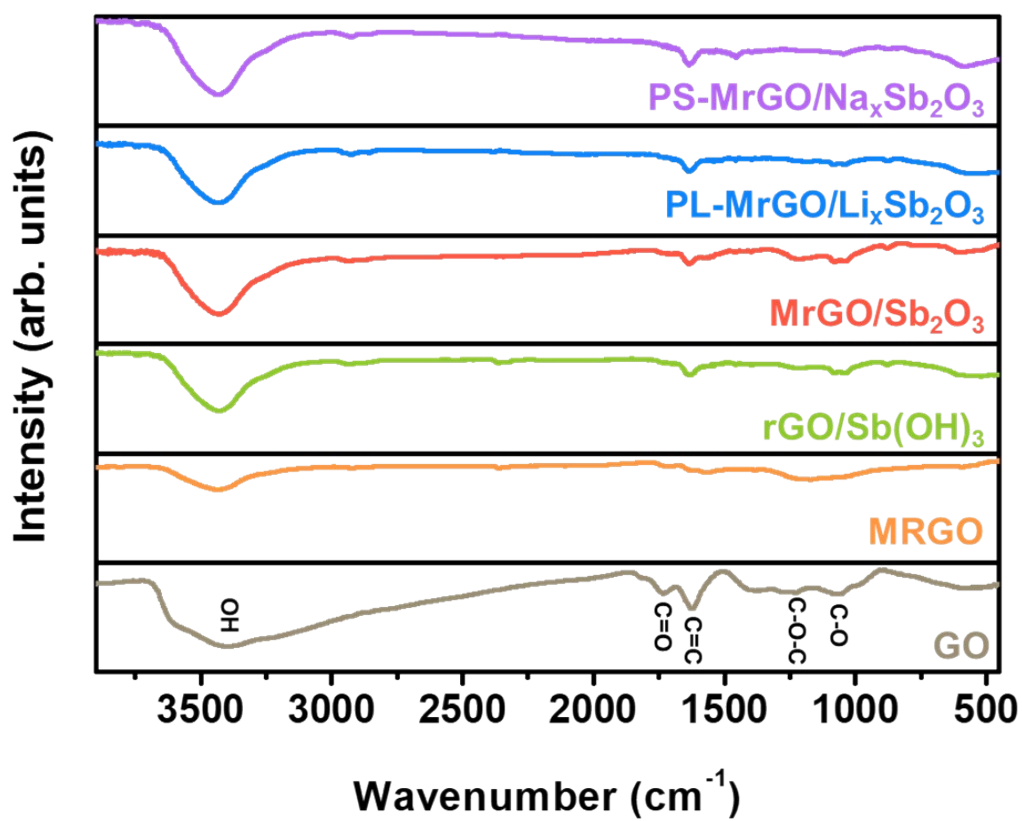

**Fig. S4.** FTIR spectra of GO, MrGO, rGO/Sb(OH)<sub>3</sub>, MrGO/Sb<sub>2</sub>O<sub>3</sub>, PL-MrGO/Li<sub>x</sub>Sb<sub>2</sub>O<sub>3</sub>, and PS-MrGO/Na<sub>x</sub>Sb<sub>2</sub>O<sub>3</sub>.

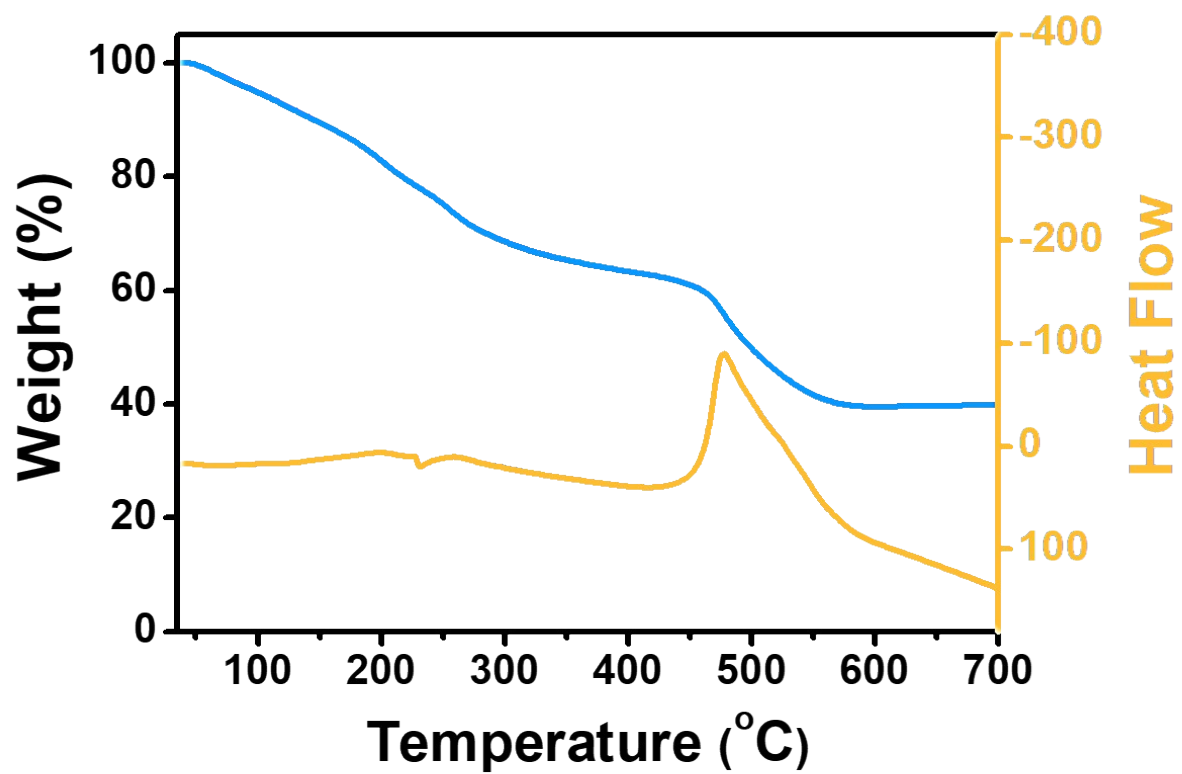

Fig. S5. TGA profiles performed in an ambient atmosphere of MrGO/Sb<sub>2</sub>O<sub>3</sub>.

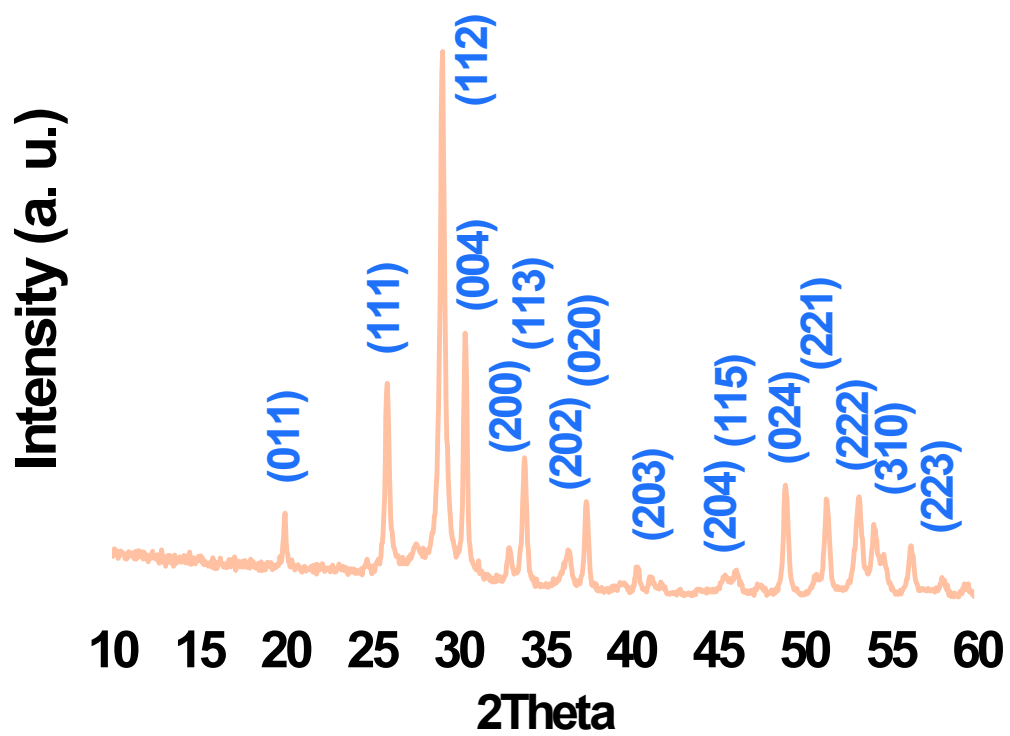

Fig. S6. XRD patterns of the residue after a TGA scan of MrGO/Sb<sub>2</sub>O<sub>3</sub>.

**Table S1.** TGA, ICP, XPS, and TEM-EDS elemental analysis results of MrGO/Sb<sub>2</sub>O<sub>3</sub>.

| TGA (wt%)                                   | ICP (wt%)       | EDS (wt%)       | XPS (wt%) |       |                 |
|---------------------------------------------|-----------------|-----------------|-----------|-------|-----------------|
| <sup>a</sup> Sb <sub>2</sub> O <sub>4</sub> | <sup>b</sup> Sb | <sup>c</sup> Sb | C         | O     | <sup>d</sup> Sb |
| 39.50                                       | 29.81           | 27.23           | 52.45     | 15.25 | 32.30           |

<sup>a</sup>Sb<sub>2</sub>O<sub>4</sub> residual mass = 39.50 wt%, Sb = 31.28 wt%, Sb<sub>2</sub>O<sub>3</sub> = 37.44 wt% (In the MrGO/Sb<sub>2</sub>O<sub>3</sub>)

<sup>b</sup>Sb component = 29.81 wt%, Sb<sub>2</sub>O<sub>3</sub> = 35.68 wt% (In the MrGO/Sb<sub>2</sub>O<sub>3</sub>)

<sup>c</sup>Sb component = 27.23 wt%, Sb<sub>2</sub>O<sub>3</sub> = 32.59 wt% (In the MrGO/Sb<sub>2</sub>O<sub>3</sub>)

<sup>d</sup>Sb component = 32.30 wt%, Sb<sub>2</sub>O<sub>3</sub> = 38.66 wt% (On the MrGO/Sb<sub>2</sub>O<sub>3</sub> surface)



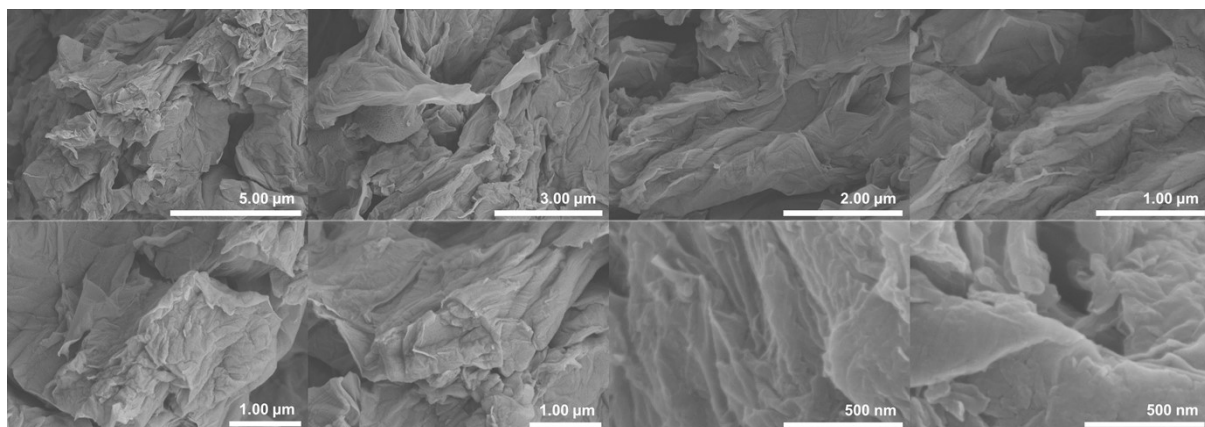

**Fig. S7.** SEM images of GO.

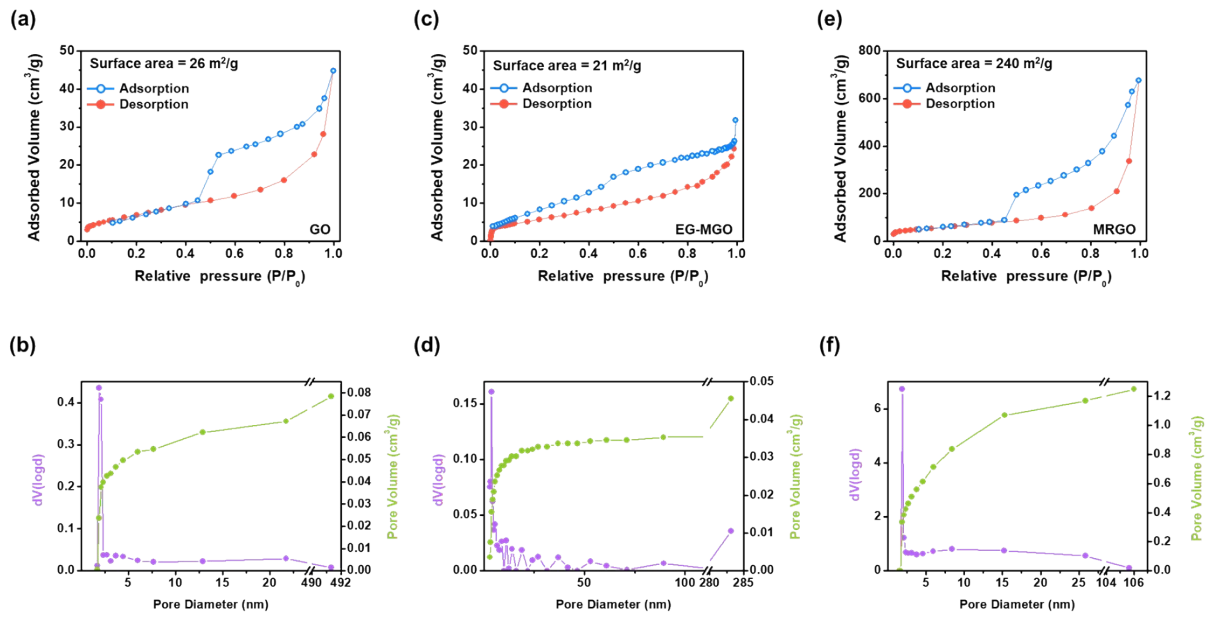

**Fig. S8.**  $N_2$  adsorption-desorption isotherms and pore size distribution curve based on the Barrett-Joyner-Halenda (BJH) method for (a,b) GO, (c,d) EG-MGO, and (e,f) MRGO.

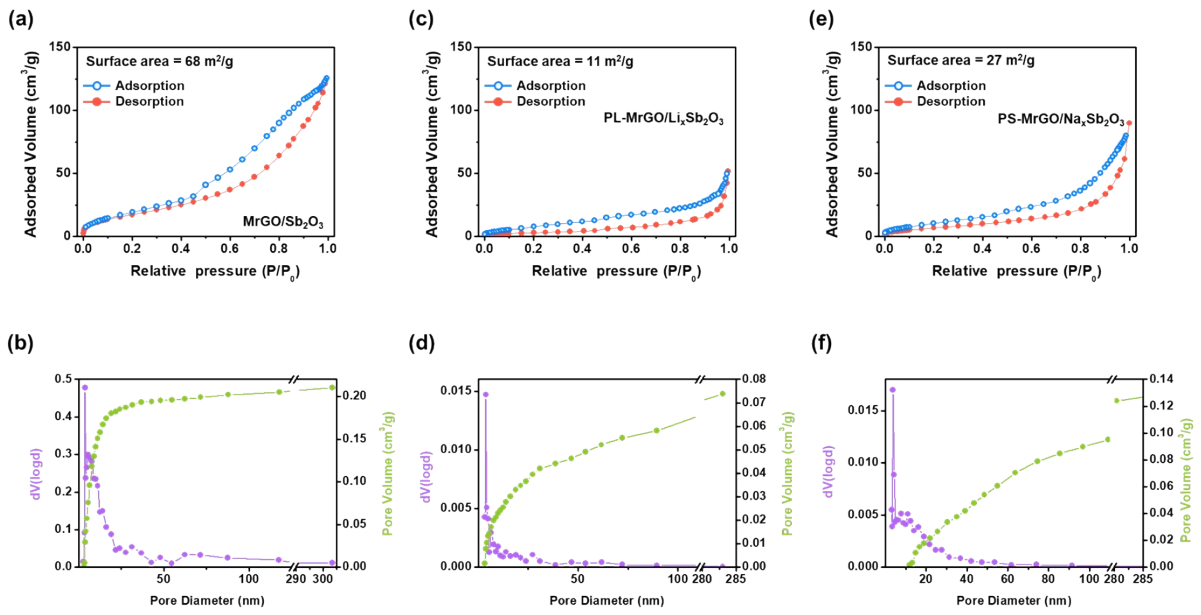

**Fig. S9.**  $N_2$  adsorption-desorption isotherms and pore size distribution curve based on the Barrett-Joyner-Halenda (BJH) method for (a,b) MrGO/Sb<sub>2</sub>O<sub>3</sub>, (c,d) PL-MrGO/Li<sub>x</sub>Sb<sub>2</sub>O<sub>3</sub>, and (e,f) PS-MrGO/Na<sub>x</sub>Sb<sub>2</sub>O<sub>3</sub>.

**Table S2.** Surface area, pore volume, and pore diameter corresponding to **Figs. S12** and **S13**.

|                                                        | Surface area (m <sup>2</sup> g <sup>-1</sup> ),<br>BET method | Pore volume (cm <sup>3</sup> g <sup>-1</sup> ), BJH method des | Pore diameter (nm),<br>BJH method des |
|--------------------------------------------------------|---------------------------------------------------------------|----------------------------------------------------------------|---------------------------------------|
| GO                                                     | 26                                                            | 0.078                                                          | 1.91                                  |
| EG-MGO                                                 | 21                                                            | 0.046                                                          | 3.83                                  |
| MrGO                                                   | 240                                                           | 1.25                                                           | 1.91                                  |
| MrGO/Sb <sub>2</sub> O <sub>3</sub>                    | 68                                                            | 0.21                                                           | 3.82                                  |
| PL-MrGO/Li <sub>x</sub> Sb <sub>2</sub> O <sub>3</sub> | 11                                                            | 0.074                                                          | 3.81                                  |
| PS-MrGO/Na <sub>x</sub> Sb <sub>2</sub> O <sub>3</sub> | 27                                                            | 0.14                                                           | 3.84                                  |

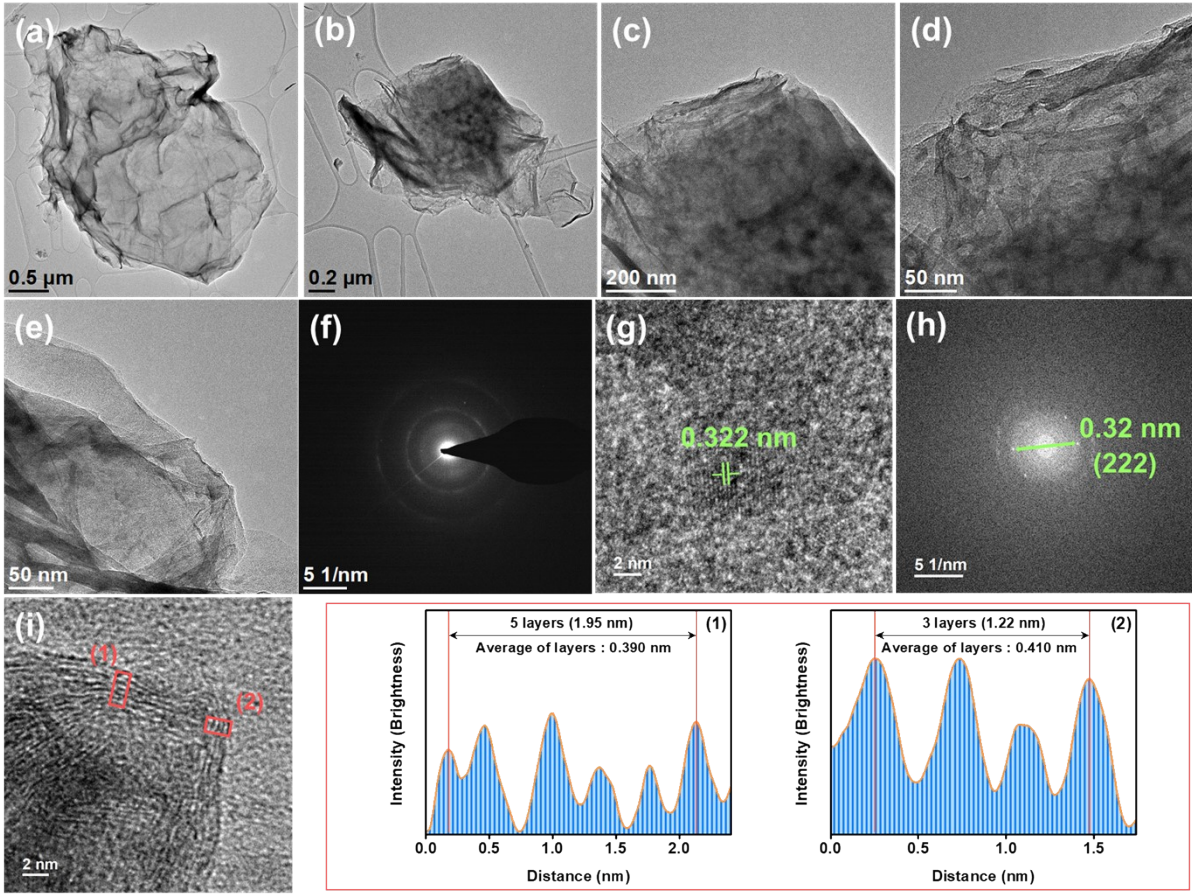

**Fig. S10.** (HR)TEM images of MrGO/Sb<sub>2</sub>O<sub>3</sub> with the corresponding brightness profile and FFT images.

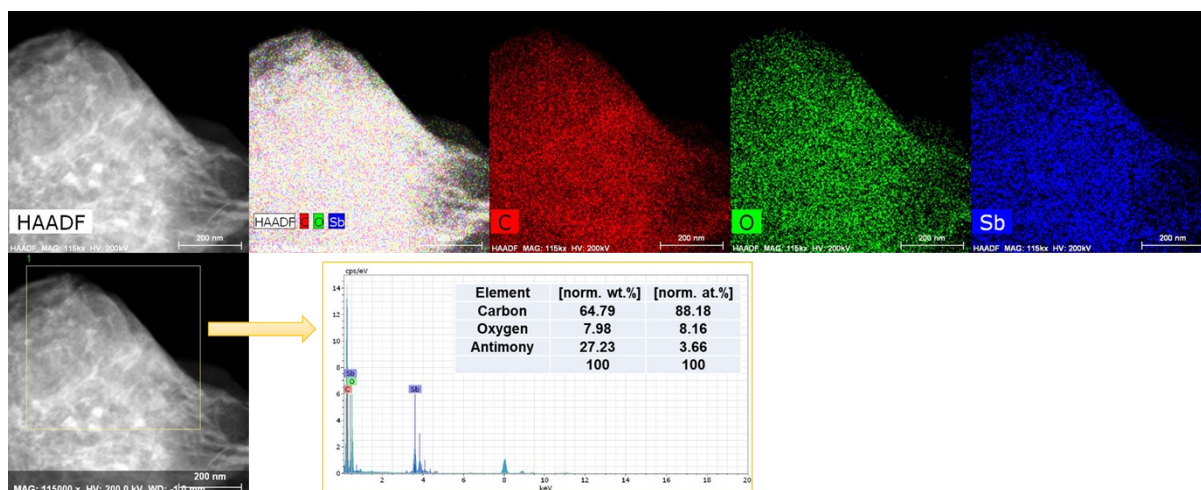

**Fig. S11.** HAADF-STEM images and the corresponding EDS mapping for MrGO/Sb<sub>2</sub>O<sub>3</sub>.

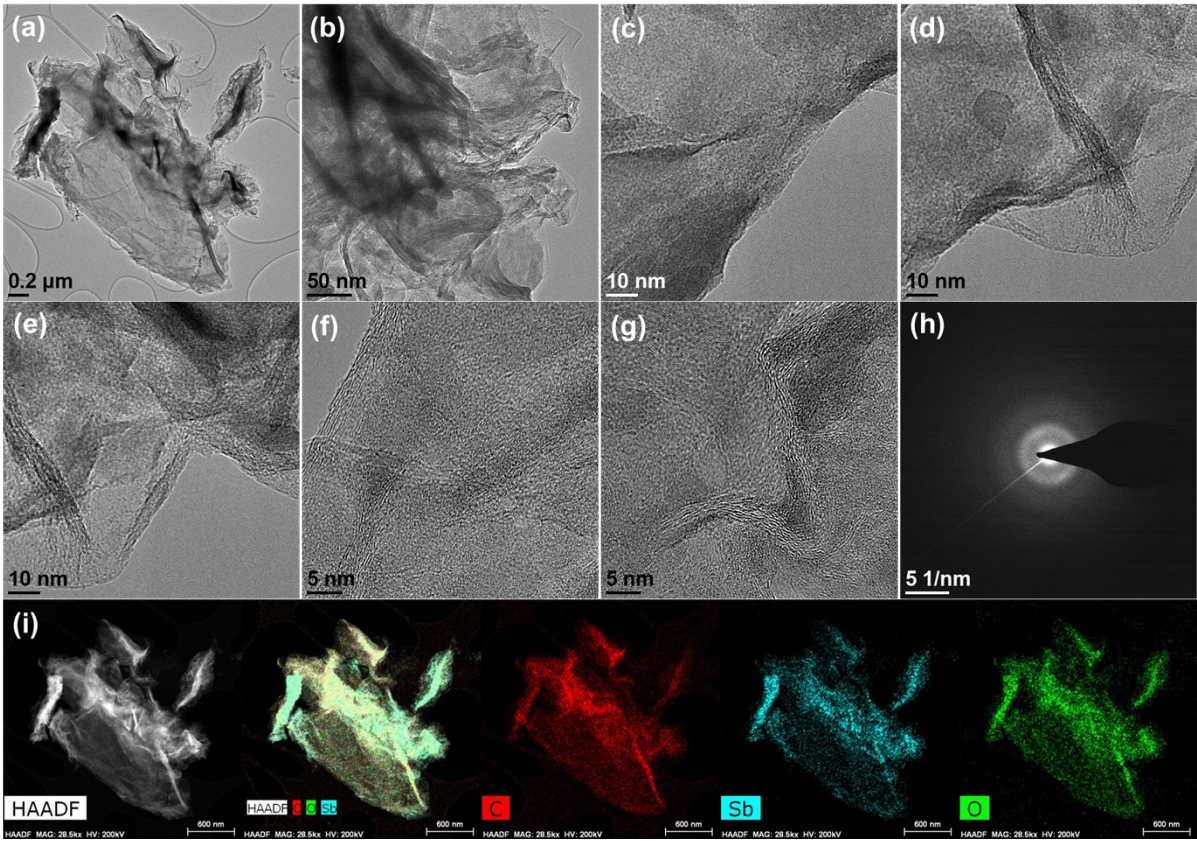

**Fig. S12.** (HR)TEM and HAADF-STEM images of PL-MrGO/Li<sub>x</sub>Sb<sub>2</sub>O<sub>3</sub> with the corresponding brightness profile, FFT images and EDS mapping.

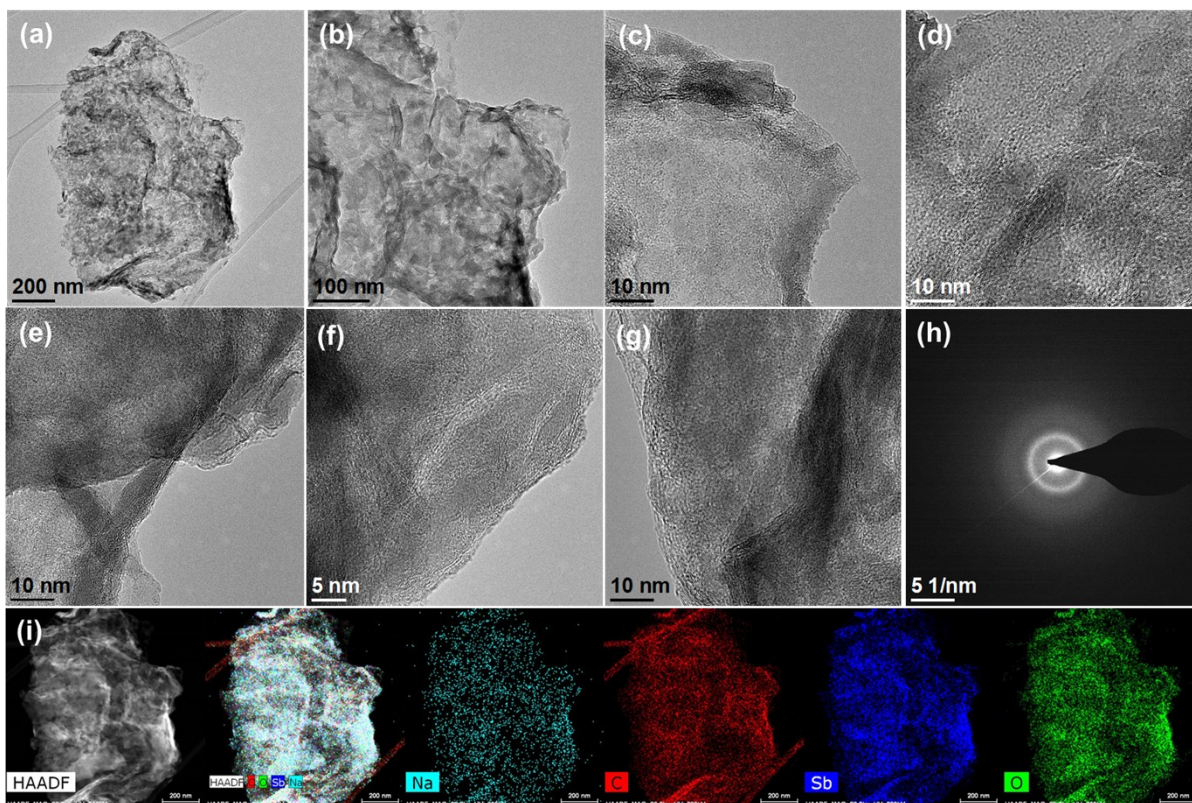

**Fig. S13.** (HR)TEM and HAADF-STEM images of PS-MrGO/ $\text{Na}_x\text{Sb}_2\text{O}_3$  with the corresponding brightness profile, FFT images and EDS mapping .



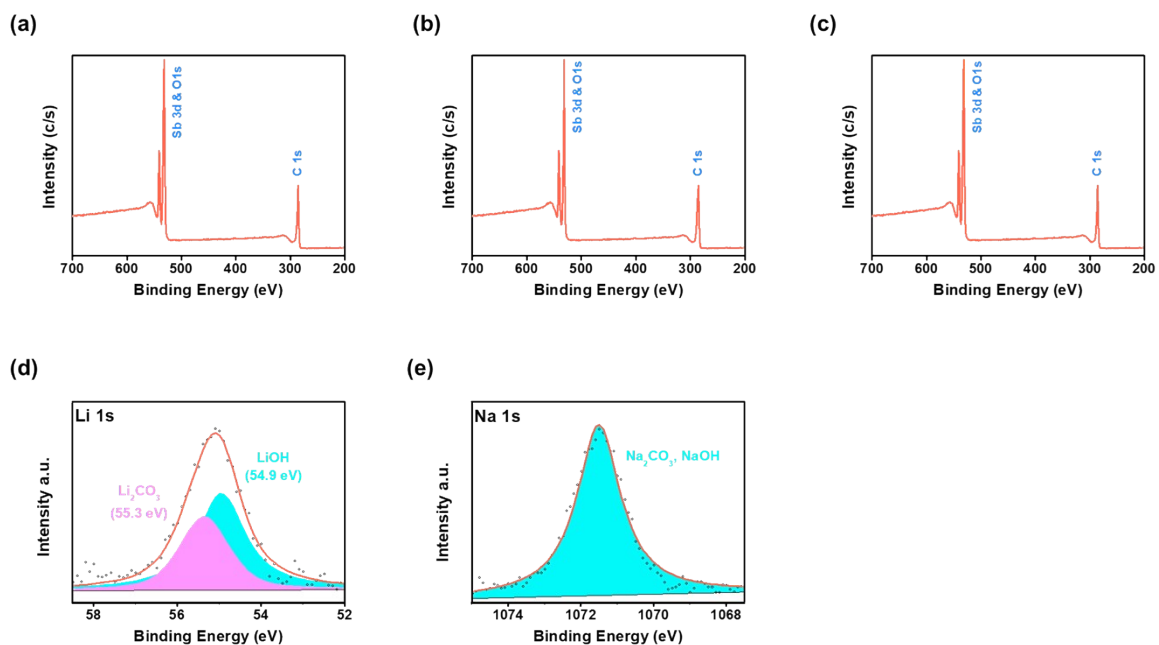

**Fig. S14.** XPS survey spectra of (a) MrGO/Sb<sub>2</sub>O<sub>3</sub>, (b) PL-MrGO/Li<sub>x</sub>Sb<sub>2</sub>O<sub>3</sub>, and (c) PS-MrGO/Na<sub>x</sub>Sb<sub>2</sub>O<sub>3</sub>; High-resolution XPS spectra of (d) Li 1s in PL-MrGO/Li<sub>x</sub>Sb<sub>2</sub>O<sub>3</sub>, (e) Na 1s in PS-MrGO/Na<sub>x</sub>Sb<sub>2</sub>O<sub>3</sub>.

**Table S3.** Elemental analysis of PL-MrGO/Li<sub>x</sub>Sb<sub>2</sub>O<sub>3</sub>.

| XPS (wt%) |       |       |       |
|-----------|-------|-------|-------|
| C         | O     | Sb    | Li    |
| 35.12     | 31.38 | 19.26 | 14.24 |

**Table S4.** Elemental analysis of PS-MrGO/Na<sub>x</sub>Sb<sub>2</sub>O<sub>3</sub>.

| XPS (wt%) |       |       |     |
|-----------|-------|-------|-----|
| C         | O     | Sb    | Na  |
| 51.14     | 12.86 | 32.06 | 3.9 |

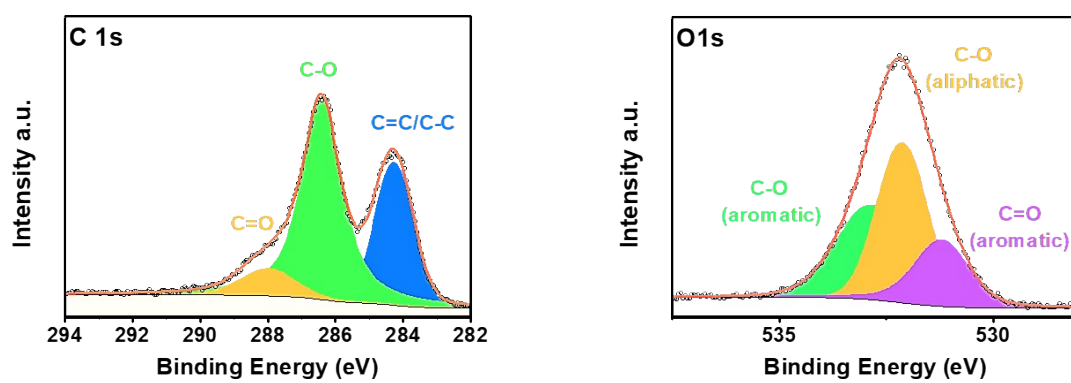

**Fig. S15.** High-resolution XPS spectra of Li 1s and O 1s in GO

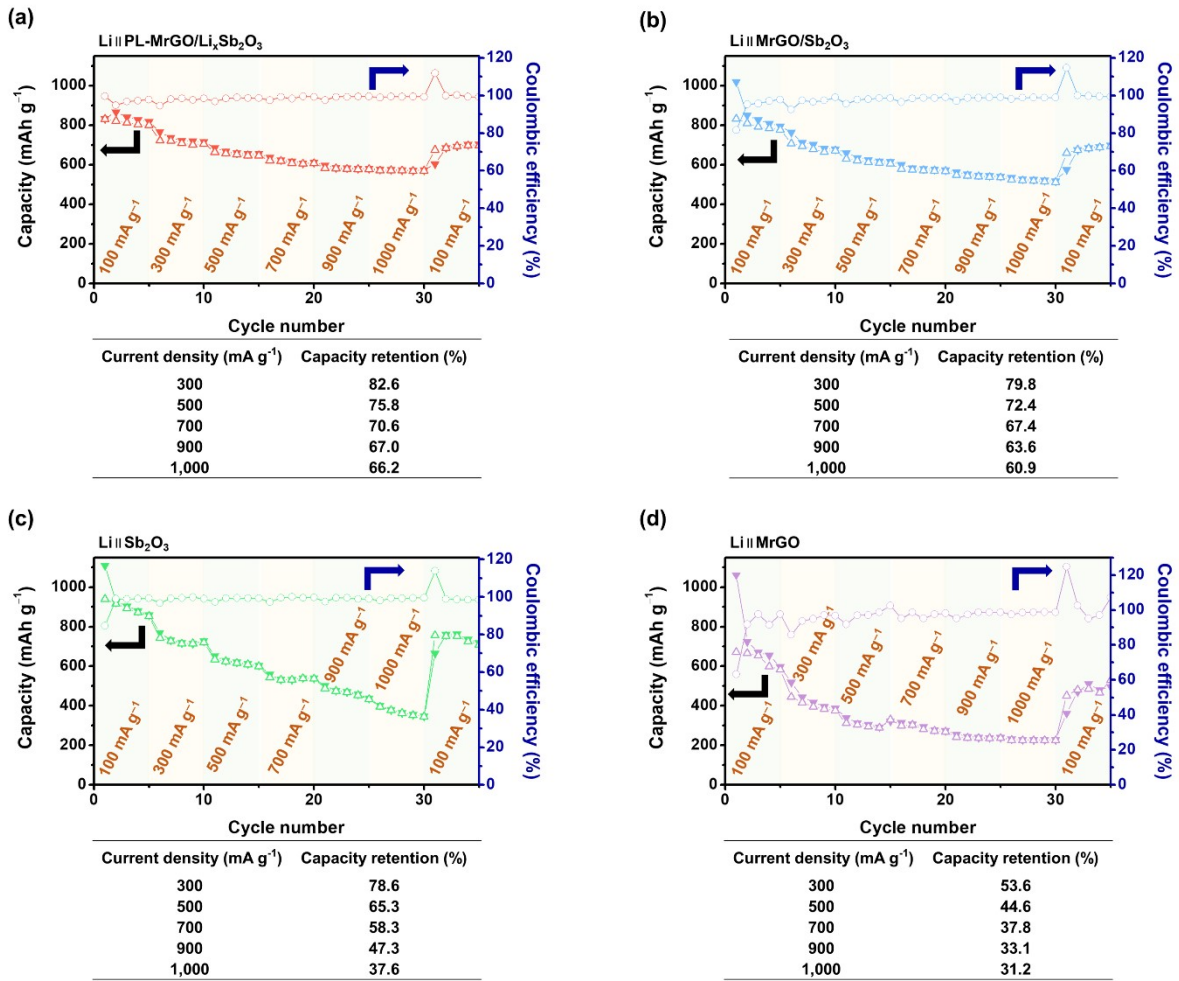

**Fig. S16.** Rate performance and capacity retention at various current densities for the (a) PL-MrGO/Li<sub>x</sub>Sb<sub>2</sub>O<sub>3</sub>, (b) MrGO/Sb<sub>2</sub>O<sub>3</sub>, (c) Sb<sub>2</sub>O<sub>3</sub> and (d) MrGO electrodes over the initial 35 cycles, as shown in Fig. 4a. Capacity retention at current densities of 300, 500, 700, 900, and 1000 mA g<sup>-1</sup> was calculated relative to the reversible capacity (discharge capacity in the 2<sup>nd</sup> cycle) measured at 100 mA g<sup>-1</sup>.

**Table S5.** Performance metrics of Sb-based anode materials for LIBs reported in the last three years; <sup>a)</sup> capacity (mA h g<sup>-1</sup>); <sup>b)</sup> current density (mA g<sup>-1</sup>).

| Anode materials                                          | Brief description                                                                                                                                                                                                                              | Capacity<br>(Capacity <sup>a)</sup> /Current<br>density <sup>b</sup> /Cycle<br>number) | Voltage<br>range<br>(vs.<br>Li/Li <sup>+</sup> ) | Ref.                 |
|----------------------------------------------------------|------------------------------------------------------------------------------------------------------------------------------------------------------------------------------------------------------------------------------------------------|----------------------------------------------------------------------------------------|--------------------------------------------------|----------------------|
| <b>PL-MrGO/Li<sub>x</sub>Sb<sub>2</sub>O<sub>3</sub></b> | -Pre-lithiated MrGO/Li <sub>x</sub> Sb <sub>2</sub> O <sub>3</sub> combines a stable inorganic SEI and amorphous Li <sub>x</sub> Sb <sub>2</sub> O <sub>3</sub> , achieving high coulombic efficiency and excellent cycling stability in LIBs. | 877.7/100/150                                                                          | 0.01–3.0                                         | <b>This<br/>work</b> |
|                                                          |                                                                                                                                                                                                                                                | 715.7/1000/1000                                                                        |                                                  |                      |
|                                                          |                                                                                                                                                                                                                                                | 315.3/5000/300                                                                         |                                                  |                      |
| <b>MrGO/Sb<sub>2</sub>O<sub>3</sub></b>                  | -MrGO/Sb <sub>2</sub> O <sub>3</sub> integrates Sb <sub>2</sub> O <sub>3</sub> nanoparticles into a graphene matrix, enhancing conductivity and mitigating volume changes for stable energy storage.                                           | 736.4/100/150                                                                          | V                                                |                      |
|                                                          |                                                                                                                                                                                                                                                | 335.5/1000/1000                                                                        |                                                  |                      |
|                                                          |                                                                                                                                                                                                                                                | 169.4/5000/3000                                                                        |                                                  |                      |
| <b>Sb@HPC</b>                                            | Sb@HPCs were synthesized by encapsulating Sb nanoparticles in a hierarchical porous carbon structure to improve electrochemical performance.                                                                                                   | 595.2/100/100<br>320.4/1000/800                                                        | 0.01–3.0<br>V                                    | S1                   |
| <b>SbBr<sub>3</sub></b>                                  | SbBr <sub>3</sub> was used as an anode, where a two-step lithiation process creates a porous Sb structure.                                                                                                                                     | 345/100/100                                                                            | 0.01–2.0<br>V                                    | S2                   |
| <b>NSO-CB</b>                                            | Nickel antimony oxide (NiSb <sub>2</sub> O <sub>6</sub> ; NSO) is synthesized via co-precipitation.<br>The tri-rutile phase of NSO stores lithium ions via a conversion mechanism.                                                             | 574/500/100                                                                            | 0.01–2.5<br>V                                    | S3                   |
| <b>DCAS</b>                                              | Crystalline organic hybrid cadmium antimony sulfide (DCAS) nanoparticles were synthesized via solvothermal synthesis, ball milling, and ultrasonic pulverization.                                                                              | 705.6/1000/500                                                                         | 0.01–3.0<br>V                                    | S4                   |
| <b>NiSb@CN</b>                                           | M-Sb (M=Co, Ni) nanoparticles in nitrogen-doped carbon nanofibers form 3D composites that reduce volume expansion and improve charge transport.                                                                                                | 647.4/500/600                                                                          | 0.01–3.0<br>V                                    | S5                   |
| <b>Sb/CoSb<sub>2</sub>@CN</b>                            |                                                                                                                                                                                                                                                | 620.2/500/600                                                                          |                                                  |                      |
| <b>amorphous Sb/C-40</b>                                 | The amorphous Sb/C electrode, prepared via high-energy ball milling, demonstrates outstanding cycling stability by mitigating volume expansion and enhancing diffusion kinetics.                                                               | 407.3/2000/1500                                                                        | 0.01–2.0<br>V                                    | S6                   |
| <b>C-Sb-2</b>                                            | C-Sb composites were synthesized via electrospinning, embedding Sb in amorphous carbon fibers to improve conductivity and stability                                                                                                            | 589.2/500/1000                                                                         | 0.01–3.0<br>V                                    | S7                   |
| <b>Si-Sb</b>                                             | The Si-Sb composite was synthesized via magnesiothermic reduction and chemical etching to create a porous structure with Sb nanodots.                                                                                                          | 820/1000/320                                                                           | 0.01–1.5<br>V                                    | S8                   |
| <b>MXene@AME</b>                                         | The MXene@AME heterostructure was synthesized via                                                                                                                                                                                              | 455/200/300                                                                            | 0.01–3.0                                         | S9                   |

|                                                                  |                                                                                                                                                                                                                                       |                               |               |     |
|------------------------------------------------------------------|---------------------------------------------------------------------------------------------------------------------------------------------------------------------------------------------------------------------------------------|-------------------------------|---------------|-----|
|                                                                  | electrostatic self-assembly, surface grafting, and annealing to form Ti–O–Sb bonds.                                                                                                                                                   | 463/1000/2000                 | V             |     |
| <b>Sb<sub>6</sub>O<sub>13</sub>/HrGO</b>                         | Sb <sub>6</sub> O <sub>13</sub> was embedded in 3D HrGO sheets via an H <sub>2</sub> O <sub>2</sub> -assisted solvothermal method.                                                                                                    | 725.1/200/200                 | 0.01–3.0<br>V | S10 |
| <b>MSC-2</b>                                                     | The MXene-reinforced Sb@C nanocomposite was synthesized by combining MXene with a MOF-derived carbon layer.                                                                                                                           | 230.4/2000/1000               | 0.01–3.0<br>V | S11 |
| <b>Sb<sub>2</sub>O<sub>3</sub>-rGO</b>                           | Sb <sub>2</sub> O <sub>3</sub> -rGO composites were developed to address the volume expansion issue of Sb <sub>2</sub> O <sub>3</sub> .                                                                                               | 744/100/310<br>386.9/500/1200 | 0.01–3.0<br>V | S12 |
| <b>SS-GO</b>                                                     | Sb nanoparticles were encapsulated in carbon spheres and connected with graphene via a hierarchical double-carbon composite strategy.                                                                                                 | 373.7/2000/2200               | 0.01–2.5<br>V | S13 |
| <b>Sb<sub>2</sub>S<sub>3</sub>/SnO<sub>2</sub>@rGO</b>           | Sb <sub>2</sub> S <sub>3</sub> /SnO <sub>2</sub> @rGO composite was synthesized by anchoring Sb <sub>2</sub> S <sub>3</sub> /SnO <sub>2</sub> quantum dots on rGO, enhancing conductivity and stability through a p–n heterojunction. | 474/3000/2000                 | 0.01–3.0<br>V | S14 |
| <b>CoSb<sub>2</sub>O<sub>6</sub>/rGO</b>                         | The CoSb <sub>2</sub> O <sub>6</sub> /rGO composite was synthesized using a sol–gel method, with rGO added to buffer volume expansion and enhance ion/electron transfer.                                                              | 444.8/1000/100                | 0.01–3.0<br>V | S15 |
| <b>ZSO-CB</b>                                                    | Zinc antimony oxide (ZnSb <sub>2</sub> O <sub>6</sub> ) was synthesized by a solution-based method, and ZSO-CB electrodes were fabricated using electrophoretic deposition at 100 V for 3 minutes.                                    | 464/500/400                   | 0.01–3.0<br>V | S16 |
| <b>3:1 TiO<sub>2</sub>/Sb<sub>2</sub>O<sub>3</sub> composite</b> | TiO <sub>2</sub> @Sb <sub>2</sub> O <sub>3</sub> composites were synthesized by combining TiO <sub>2</sub> and Sb <sub>2</sub> O <sub>3</sub> in different ratios through a straightforward method.                                   | 536/100/100                   | 0.01–3.0<br>V | S17 |
| <b>Co–Sb<sub>2</sub>O<sub>5</sub>/rGO</b>                        | Co–Sb <sub>2</sub> O <sub>5</sub> /rGO nanocomposite was synthesized via solvothermal method, with Co <sup>2+</sup> ions enhancing Sb <sub>2</sub> O <sub>5</sub> deposition on rGO, improving electron/ion migration and stability.  | 1027/200/200<br>648/500/500   | 0.01–3.0<br>V | S18 |
| <b>NS-C@SbPO<sub>4</sub>/MoO<sub>x</sub></b>                     | NS-C@SbPO <sub>4</sub> /MoO <sub>x</sub> nanowires were synthesized by annealing polyphosphazene-coated Sb <sub>2</sub> MoO <sub>6</sub> , forming N/S co-doped carbon shells to enhance conductivity and stability.                  | 449.8/1000/700                | 0.01–3.0<br>V | S19 |
| <b>Sb-Si-Te@C</b>                                                | Sb <sub>2</sub> Si <sub>2</sub> Te <sub>6</sub> was synthesized by mechanical alloying and annealing, then coated with carbon via PAN pyrolysis to improve conductivity and cycling stability for LIB anodes.                         | 505.6/100/200                 | 0.01–2.5<br>V | S20 |
| <b>Sb<sub>2</sub>O<sub>3</sub>/rGO-100</b>                       | The Sb <sub>2</sub> O <sub>3</sub> /rGO composite was made by thermally decomposing antimony 2-ethylhexanoate on rGO, forming ultrafine Sb <sub>2</sub> O <sub>3</sub> nanoparticles.                                                 | 513/500/300                   | 0.01–3.0<br>V | S21 |
| <b>NiSb/C</b>                                                    | NiSb alloy embedded in nitrogen-doped carbon (NiSb/C) was synthesized using citric acid as a surfactant, creating a carbon layer with high defects and uniform NiSb nanoparticle                                                      | 426/2000/450                  | 0.01–2.6<br>V | S22 |

|                                                         |                                                                                                                                                                                                                                                            |                                    |               |     |
|---------------------------------------------------------|------------------------------------------------------------------------------------------------------------------------------------------------------------------------------------------------------------------------------------------------------------|------------------------------------|---------------|-----|
|                                                         | dispersion.                                                                                                                                                                                                                                                |                                    |               |     |
| <b>NiSb-C</b>                                           | NiMC alloys (M: Sb, Sn) were synthesized by template and substitution reactions, anchoring nanoscale particles in hollow N-doped carbon tubes.                                                                                                             | 1259/100/100<br>559/2000/800       | 0.01–3.0<br>V | S23 |
| <b>Sb@C</b>                                             | The Sb@C anode was synthesized using the Stöber sol-gel method with resorcinol-formaldehyde resin, CTAB stabilization, and pH variation, forming a mesoporous carbon coating on Sb.                                                                        | 536/100/200                        | 0.01–2.5<br>V | S24 |
| <b>Sb<sub>2</sub>S<sub>3</sub>@0.3CDs</b>               | Sb <sub>2</sub> S <sub>3</sub> @Sb@C composite was synthesized by one-step heat treatment of stibnite and carbon dots.                                                                                                                                     | 648.1/100/100<br>587.7/500/200     | 0.01–3.0<br>V | S25 |
| <b>Sb<sub>2</sub>S<sub>3</sub>/Sb@TiO<sub>2</sub>@C</b> | The Sb <sub>2</sub> S <sub>3</sub> /Sb@TiO <sub>2</sub> @C composite was synthesized by coating Sb <sub>2</sub> S <sub>3</sub> nanorods with TiO <sub>2</sub> and polydopamine, followed by carbothermic reduction, creating a core–shell–shell structure. | 495.8/500/500                      | 0.01–3.0<br>V | S26 |
| <b>TAO@G</b>                                            | TAO@G was synthesized through a hydrothermal process, combining TAO nanoparticles with graphene to improve electrical conductivity and mitigate volume expansion.                                                                                          | 648.1/500/365                      | 0.01–3.0<br>V | S27 |
| <b>S@Sb@N-CNF</b>                                       | The S@Sb@N-CNFs were synthesized by preparing an antimony and sulfur precursor in nitrogen-doped electrospun carbon nanofibers, followed by carbonization to embed Sb nanoparticles within the doped carbon matrix.                                        | 394.5/2000/2000<br>288.5/5000/5000 | 0.01–3.0<br>V | S28 |
| <b>3DPNS-Sb/C-2</b>                                     | The 3DPNS-Sb/C composites were synthesized by embedding Sb nanoparticles in a self-supported organic carbon 3D polymer network via a hydrothermal reaction followed by heat treatment, ensuring uniformity and structural integrity.                       | 440.5/1000/250                     | 0.01–2.0<br>V | S29 |
| <b>Sb@C@NC</b>                                          | The spindle-structured Sb@C@NC anode was fabricated using a metal–organic-framework-derived approach, followed by polydopamine coating and galvanic replacement, which effectively reduces volume expansion and improves electrochemical stability.        | 160/1000/500                       | 0.01–2.0<br>V | S30 |
| <b>Sb/N-HPCNF</b>                                       | Sb/N-HPCNF was synthesized through electrospinning and in-situ substitution to create a hollow structure that enhances electrochemical performance and cycling stability for sodium-ion battery applications.                                              | 281/2000/2000                      | 0.01–2.5<br>V | S31 |
| <b>Sb<sub>2</sub>S<sub>3</sub>-NPs@AC</b>               | Sb <sub>2</sub> S <sub>3</sub> nanoparticles were encapsulated in activated carbon as anode materials for lithium-ion batteries using a high-temperature melting method with untreated natural stibnite ore.                                               | 326.3/300/800                      | 0.01–3.0<br>V | S32 |
| <b>Sb<sub>2</sub>O<sub>4</sub>@PPy nanocomposite</b>    | Sb <sub>2</sub> O <sub>4</sub> @PPy core-shell nanospheres were synthesized using a method combining controllable nanostructure synthesis and conductive composite engineering.                                                                            | 542.8/1000/250                     | 0.01–3.0<br>V | S33 |



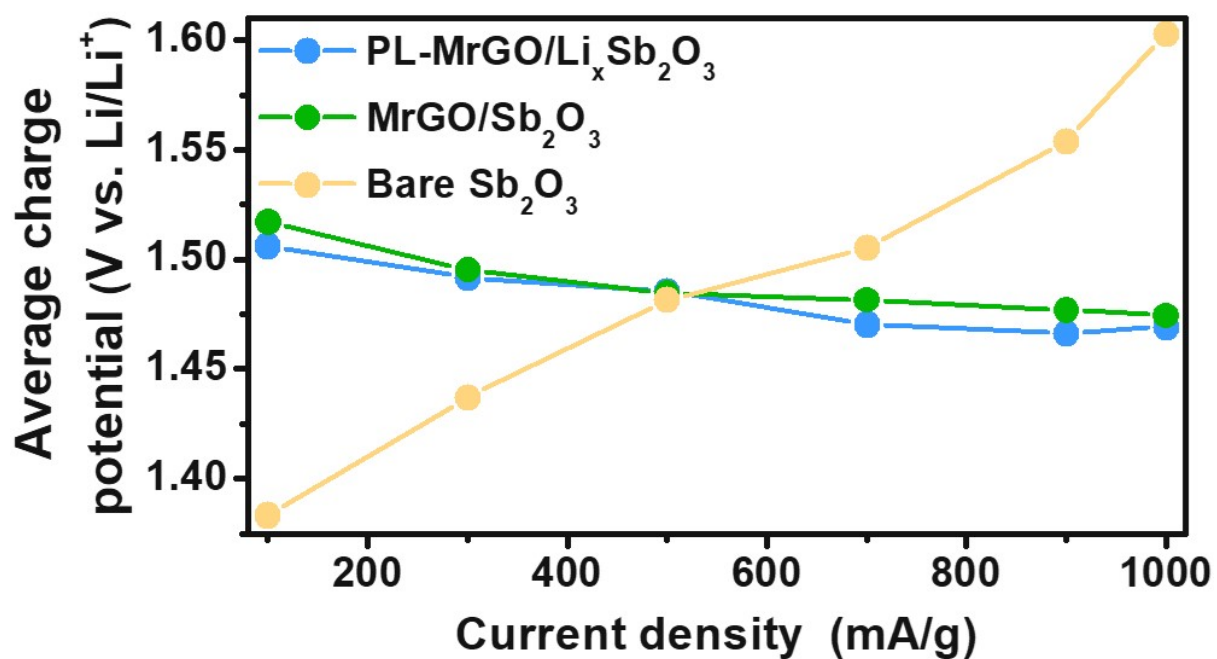

Fig. S17. Average charge potential of PL-MrGO/Li<sub>x</sub>Sb<sub>2</sub>O<sub>3</sub>, MrGO/Sb<sub>2</sub>O<sub>3</sub>, and bare Sb<sub>2</sub>O<sub>3</sub> at different current densities (100–1000 mA g<sup>-1</sup>).



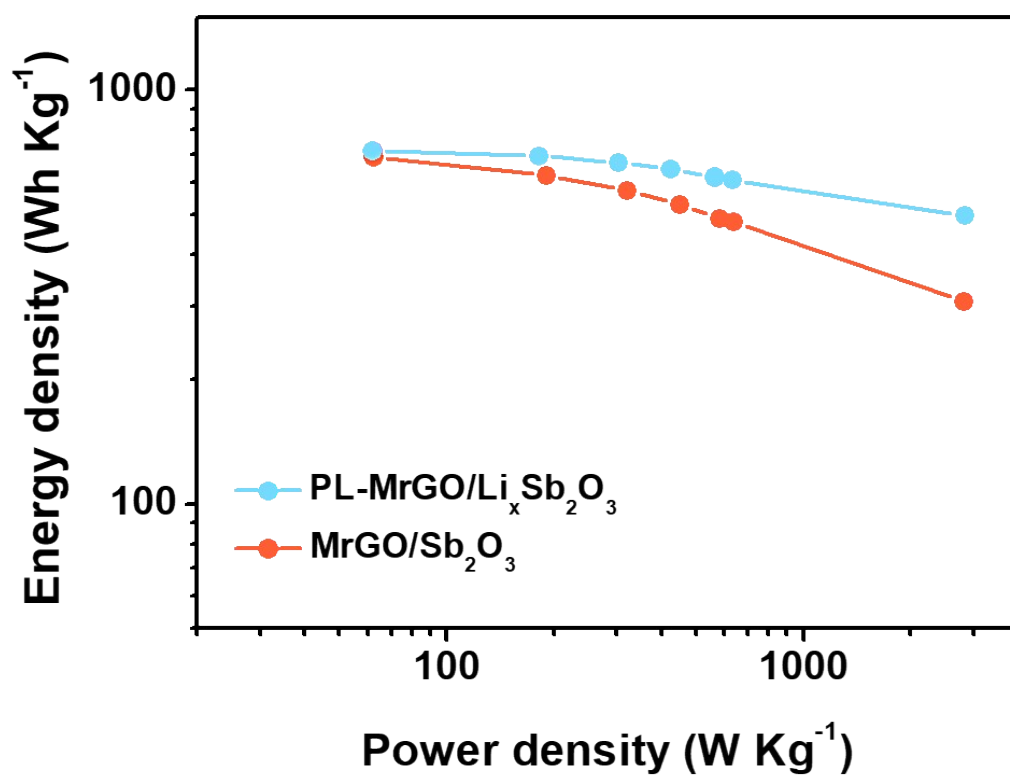

Fig. S18. Ragone plots of PL-MrGO/Li<sub>x</sub>Sb<sub>2</sub>O<sub>3</sub> and MrGO/Sb<sub>2</sub>O<sub>3</sub> electrodes in LIBs.

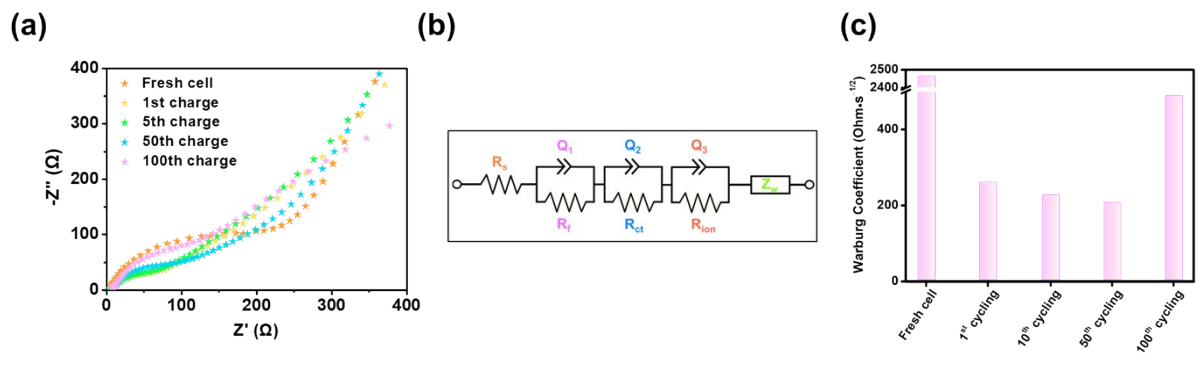

**Fig. S19.** (a) Nyquist plot and (b) DRT plot of the bare  $Sb_2O_3$  electrode in LIBs measured up to the 100<sup>th</sup> cycle; (c) Warburg coefficients

**Table S6.** Impedance parameters fitted using the equivalent circuit model in **Fig. 6g**;  $R_s$  ( $\Omega$ );  $R_f$  ( $\Omega$ );  $R_{ct}$  ( $\Omega$ );  $R_{ion}$  ( $\Omega$ ).

|                               | MrGO/Sb <sub>2</sub> O <sub>3</sub> |       |          | PL-MrGO/Li <sub>x</sub> Sb <sub>2</sub> O <sub>3</sub> |       |          |           |
|-------------------------------|-------------------------------------|-------|----------|--------------------------------------------------------|-------|----------|-----------|
|                               | $R_s$                               | $R_f$ | $R_{ct}$ | $R_s$                                                  | $R_f$ | $R_{ct}$ |           |
| <b>Fresh cell</b>             | 3.3                                 | 8.2   | 117.4    | 4.5                                                    | 5.6   | 59.2     |           |
| <b>1<sup>st</sup> cycle</b>   | 3.5                                 | 7.2   | 20.3     | 4.1                                                    | 4.8   | 22.5     |           |
| <b>5<sup>th</sup> cycle</b>   | 3.8                                 | 8.4   | 21.7     | 4.5                                                    | 5.0   | 24.1     |           |
| <b>50<sup>th</sup> cycle</b>  | 6.9                                 | 9.3   | 26.9     | 3.4                                                    | 3.9   | 20.4     |           |
| <b>100<sup>th</sup> cycle</b> | 4.5                                 | 8.7   | 25.0     | 3.8                                                    | 3.7   | 18.7     |           |
|                               | MrGO                                |       |          | bare Sb <sub>2</sub> O <sub>3</sub>                    |       |          |           |
|                               | $R_s$                               | $R_f$ | $R_{ct}$ | $R_s$                                                  | $R_f$ | $R_{ct}$ | $R_{ion}$ |
| <b>Fresh cell</b>             | 4.9                                 | 10.8  | 73.5     | 5.5                                                    | 19.4  | 168.7    | 85.1      |
| <b>1<sup>st</sup> cycle</b>   | 4.5                                 | 14.2  | 21.6     | 4.6                                                    | 22.3  | 88.5     | 41.8      |
| <b>5<sup>th</sup> cycle</b>   | 5.6                                 | 13.6  | 20.8     | 4.8                                                    | 19.6  | 82.9     | 33.6      |
| <b>50<sup>th</sup> cycle</b>  | 4.7                                 | 14.5  | 28.4     | 6.2                                                    | 28.1  | 104.8    | 61.5      |
| <b>100<sup>th</sup> cycle</b> | 3.8                                 | 13.2  | 26.1     | 7.2                                                    | 42.9  | 126.3    | 93.5      |

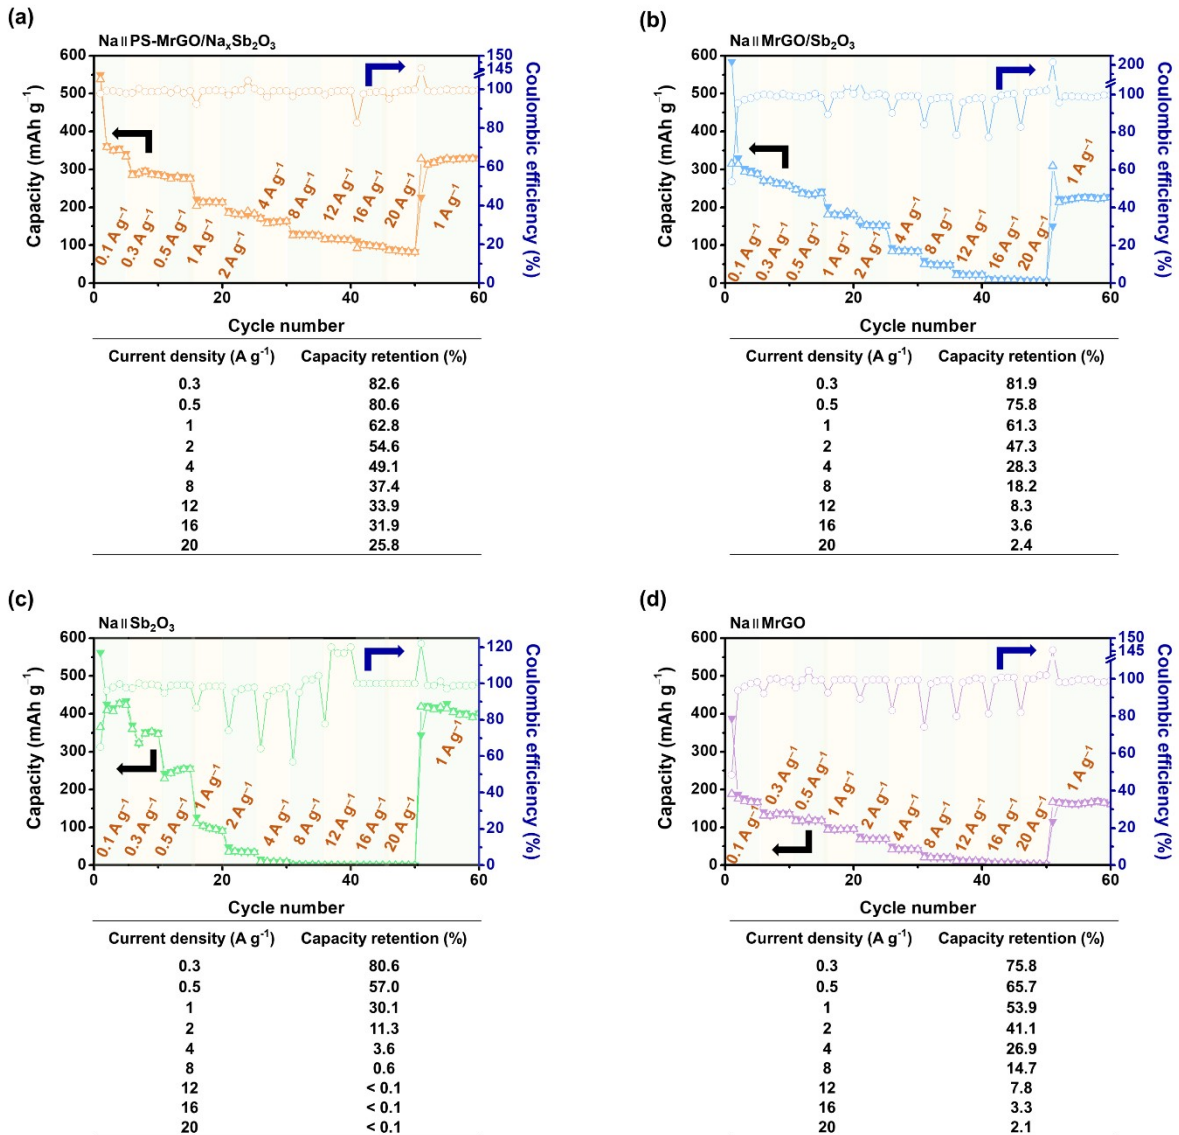

**Fig. S20.** Rate performance and capacity retention at various current densities for the (a) PS-MrGO/Na<sub>x</sub>Sb<sub>2</sub>O<sub>3</sub>, (b) MrGO/Sb<sub>2</sub>O<sub>3</sub>, (c) Sb<sub>2</sub>O<sub>3</sub> and (d) MrGO electrodes over the initial 35 cycles, as shown in Fig. 4a. Capacity retention at current densities of 0.1, 0.3, 0.5, 1, 2, 4, 8, 12, 16 and, 20 A g<sup>-1</sup> was calculated relative to the reversible capacity (discharge capacity in the 2<sup>nd</sup> cycle) measured at 0.1 A g<sup>-1</sup>.

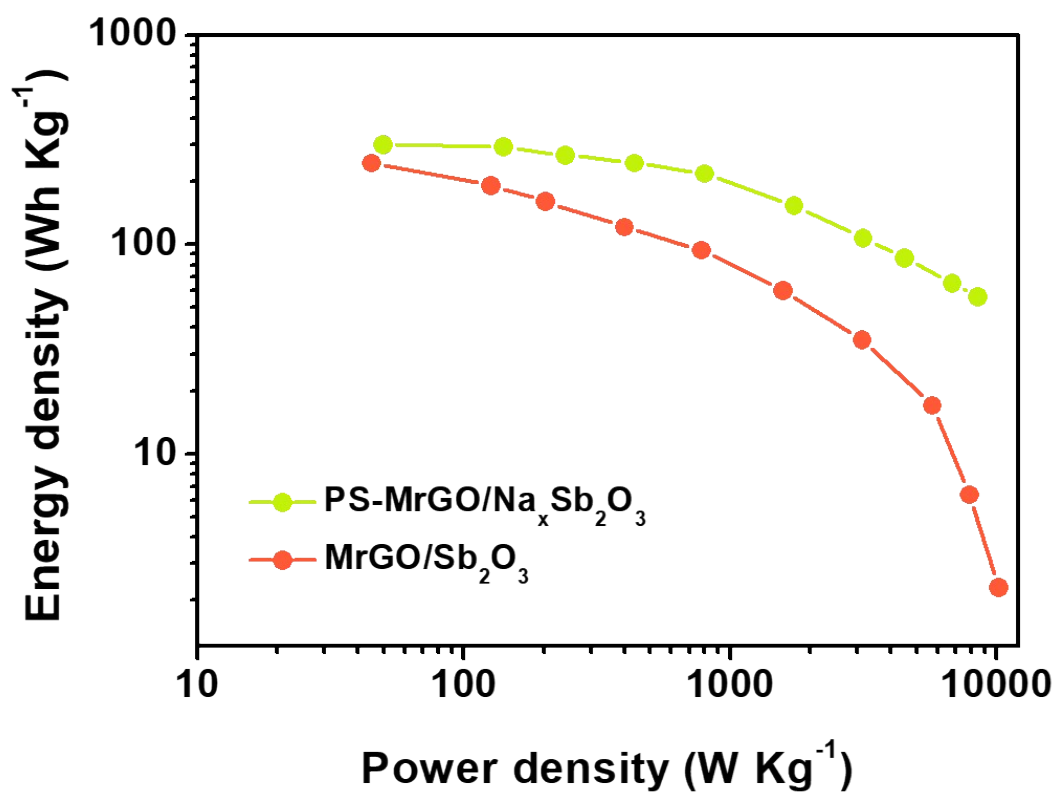

Fig. S21. Ragone plots of PS-MrGO/Na<sub>x</sub>Sb<sub>2</sub>O<sub>3</sub> and MrGO/Sb<sub>2</sub>O<sub>3</sub> electrodes in SIBs.

**Table S7.** Performance metrics of Sb-based anode materials for SIBs reported in the last two years; <sup>a)</sup> capacity (mA h g<sup>-1</sup>); <sup>b)</sup> current density (mA g<sup>-1</sup>).

| Anode materials                                          | Brief description                                                                                                                                                                                                                   | Capacity<br>(Capacity <sup>a</sup> /Current<br>density <sup>b</sup> /Cycle<br>number) | Voltage<br>range<br>(vs.<br>Na/Na <sup>+</sup> ) | Ref.                 |
|----------------------------------------------------------|-------------------------------------------------------------------------------------------------------------------------------------------------------------------------------------------------------------------------------------|---------------------------------------------------------------------------------------|--------------------------------------------------|----------------------|
| <b>PS-MrGO/Na<sub>x</sub>Sb<sub>2</sub>O<sub>3</sub></b> | Pre-sodiated PS-MrGO/Na <sub>x</sub> Sb <sub>2</sub> O <sub>3</sub> features amorphous Na <sub>x</sub> Sb <sub>2</sub> O <sub>3</sub> and a robust SEI layer, offering superior cycling stability and rate performance in SIBs.     | 386.2/100/300                                                                         | 0.01–2.5<br>V                                    | <b>This<br/>work</b> |
| <b>MrGO/Sb<sub>2</sub>O<sub>3</sub></b>                  |                                                                                                                                                                                                                                     | 313.1/1200/3000                                                                       |                                                  |                      |
| <b>Sb SA/PC-2</b>                                        | The Sb SA/PC composite was synthesized by introducing carbon vacancies into a carbon matrix, which facilitated the anchoring of Sb single atoms.                                                                                    | 251.7/100/300<br>149.8/1200/3000                                                      | 0.01–2.5<br>V                                    | S34                  |
| <b>Sb@3D-Cu</b>                                          | The Sb@3D-Cu anode was synthesized using FDM 3D printing, sintering, and electrodeposition.                                                                                                                                         | 289.6/1000/200                                                                        | 0.01–2.0<br>V                                    | S35                  |
| <b>Co-Sb<sub>2</sub>O<sub>5</sub>/rGO</b>                | The Sb <sub>2</sub> O <sub>5</sub> /rGO composite was synthesized by using Co <sup>2+</sup> ions to anchor Sb <sub>2</sub> O <sub>5</sub> nanoparticles onto rGO sheets, forming CoSb <sub>2</sub> O <sub>6</sub> nucleation sites. | 352.3/100/100                                                                         | 0.01–3.0<br>V                                    | S18                  |
| <b>SS-GO</b>                                             | Sb nanoparticles were encapsulated in carbon spheres and connected with graphene via a hierarchical double-carbon composite strategy.                                                                                               | 350/1000/120                                                                          | 0.01–2.5<br>V                                    | S13                  |
| <b>SNbM-2</b>                                            | Tin-antimony/carbon porous fibers were synthesized by electrospinning and heat treatment, improving ion transport and reducing volume expansion for better battery performance.                                                     | 319.5/100/100                                                                         | 0.01–3.0<br>V                                    | S36                  |
| <b>ZSO/rGO</b>                                           | The ZSO/rGO hybrid nanocomposite was synthesized by combining zinc antimony oxide (ZSO) with reduced graphene oxide (rGO).                                                                                                          | 357.21/50/150                                                                         | 0.01–3.0<br>V                                    | S37                  |
| <b>Sb/Sb<sub>4</sub>O<sub>5</sub>Cl<sub>2</sub>/C</b>    | The Sb/Sb <sub>4</sub> O <sub>5</sub> Cl <sub>2</sub> /C composite was synthesized through heat treatment, combining Sb precursors, a carbon source, and controlled conditions.                                                     | 508.5/100/100                                                                         | 0.01–2.5<br>V                                    | S38                  |
| <b>Bi<sub>44.9</sub>Sb<sub>55.1</sub></b>                | The Bi-Sb alloy anode was synthesized using pulsed electrodeposition, forming a Bi <sub>44.9</sub> Sb <sub>55.1</sub> structure. This design optimizes ion and electron transport.                                                  | 494.7/1000/50                                                                         | 0.01–1.5<br>V                                    | S39                  |
| <b>FSG-200</b>                                           | FeSbO <sub>4</sub> -Sb <sub>2</sub> O <sub>4</sub> /rGO composite was synthesized using a solvothermal method, anchoring hetero-nanocrystals on rGO to improve conductivity and ion diffusion.                                      | 204/500/1050                                                                          | 0.01–3.0<br>V                                    | S40                  |

|                                                        |                                                                                                                                                                                                                                                                             |                                |                 |     |
|--------------------------------------------------------|-----------------------------------------------------------------------------------------------------------------------------------------------------------------------------------------------------------------------------------------------------------------------------|--------------------------------|-----------------|-----|
| <b>m-Sb/C@MXene</b>                                    | The m-Sb/C@MXene composite is synthesized by embedding micro-sized Sb particles in carbon, then integrating them with a $Ti_3C_2T_x$ MXene network.                                                                                                                         | 407.1/100/100<br>285.8/500/200 | 0.01–2.0<br>V   | S41 |
| <b>Sb@Sb<sub>2</sub>O<sub>3</sub>@C</b>                | The core-shell Sb@Sb <sub>2</sub> O <sub>3</sub> heterostructure encapsulated in porous carbon was synthesized using a NaCl template-assisted freeze-drying method combined with slow oxidation.                                                                            | 440.6/5000/5000                | 0.01–3.0<br>V   | S42 |
| <b>Sb ACs@NSC</b>                                      | The Sb atomic clusters@N, S co-doped carbon networks were synthesized via an in situ vaporization-reduction method to balance ultra-small Sb clusters with high loading in the composite.                                                                                   | 306.7/10000/1000               | 0.01–3.0<br>V   | S43 |
| <b>Sn/Sb@Sb<sub>2</sub>SnO<sub>5</sub>@P<br/>CFs-N</b> | The Sn/Sb@Sb <sub>2</sub> SnO <sub>5</sub> @PCFs-N composite was synthesized using electrostatic spinning, where Sn and Sb nanocrystals were in situ generated around Sn-Sb oxide.                                                                                          | 450/50/100                     | 0.01–1.5<br>V   | S44 |
| <b>Sb/Sb<sub>2</sub>O<sub>3</sub>@NPC-1.0</b>          | The Sb/Sb <sub>2</sub> O <sub>3</sub> @NPC anode was synthesized using a gas–solid dual template method, embedding Sb/Sb <sub>2</sub> O <sub>3</sub> nanoparticles in nitrogen-doped porous carbon.                                                                         | 300.3/1000/1000                | 0.01–3.0<br>V   | S45 |
| <b>Sb<sub>2</sub>Se<sub>3</sub>@N-<br/>CQDs/CNF</b>    | The Sb <sub>2</sub> Se <sub>3</sub> @N-CQDs/CNF was synthesized by combining Sb <sub>2</sub> Se <sub>3</sub> nanorods, nitrogen-doped carbon quantum dots, and carbon nanofibers.                                                                                           | 413.6/200/100                  | 0.01–2.5<br>V   | S46 |
| <b>Sb: HC-1:1</b>                                      | The Sb: HC-1:1 composite was made by mixing antimony oxychloride/oxide with hard carbon, forming interconnected carbon spheres with rod-shaped antimony oxychloride/oxide.                                                                                                  | 332/200/100                    | 0.01–2.5<br>V   | S47 |
| <b>BiSb-Se/CNF</b>                                     | The BiSb-Se/CNFs composite anode was synthesized by integrating selenium-doped carbon nanofibers with bismuth-antimony alloy nanocrystals.                                                                                                                                  | 370/500/650<br>309/2000/2000   | 0.01–3.0<br>V   | S48 |
| <b>mSb/Sb<sub>2</sub>O<sub>3</sub>-HCl</b>             | The mSb/Sb <sub>2</sub> O <sub>3</sub> -HCl composite was synthesized by reducing SbCl <sub>3</sub> with NaK alloy, followed by treatment with an HCl solution.                                                                                                             | 456/800/100                    | 0.01–2.0<br>V   | S49 |
| <b>Bi<sub>0.4</sub>Sb<sub>0.6</sub></b>                | The BiSb alloy nanosheets were synthesized by using metallic Bi as a scaffold, forming a 2D alloy with different Bi/Sb ratios.                                                                                                                                              | 377/100/100                    | 0.01–2.0<br>V   | S50 |
| <b>Sb/Sb<sub>2</sub>O<sub>3</sub>-200</b>              | Sb/Sb <sub>2</sub> O <sub>3</sub> nanoparticles were synthesized by oxidizing Sb nanoparticles in air at 200 °C, optimizing the Sb <sub>2</sub> O <sub>3</sub> :Sb ratio and particle size for improved Na <sup>+</sup> storage and reduced stress in sodium-ion batteries. | 540/100/100                    | 0.01–2.0<br>V V | S51 |
| <b>SbPO<sub>4-x</sub>@CNFs</b>                         | The SbPO <sub>4-x</sub> @CNFs composite was synthesized by integrating SbPO <sub>4</sub> precursors with carbon nanofibers and inducing oxygen vacancy defects to enhance conductivity and stability.                                                                       | 322.9/500/200                  | 0.01-1.5<br>V   | S52 |
| <b>Sb@Void@GDY NB</b>                                  | Sb@Void@GDY nanoboxes were synthesized by coating Sb                                                                                                                                                                                                                        | 593/100/200                    | 0.01–2.0        | S53 |

|                                                                              |                                                                                                                                                                                                                                                                                                                               |                                  |               |     |
|------------------------------------------------------------------------------|-------------------------------------------------------------------------------------------------------------------------------------------------------------------------------------------------------------------------------------------------------------------------------------------------------------------------------|----------------------------------|---------------|-----|
|                                                                              | nanoparticles with polydopamine, converting it into GDY shells via chemical vapor deposition, and creating voids between Sb and GDY to form a yolk-shell structure.                                                                                                                                                           | 325/1000/8000                    | V             |     |
| <b>SnSb@CNF/CNT</b>                                                          | The SnSb@CNF/CNT anode was synthesized using electrospinning and calcination, featuring a 3D cross-linked carbon nanofiber (CNF) and carbon nanotube (CNT) structure.                                                                                                                                                         | 210/500/700                      | 0.01–3.0<br>V | S54 |
| <b>Bi<sub>1</sub>Sb<sub>1</sub>@C</b>                                        | A series of Bi–Sb composites confined in a porous carbon matrix were synthesized via pyrolysis.                                                                                                                                                                                                                               | 201.9/200/500<br>167.2/1000/8000 | 0.01–2.0<br>V | S55 |
| <b>TiO<sub>2</sub>@C-Sb</b>                                                  | TiO <sub>2</sub> @C-Sb nanotablets were synthesized by absorbing SbCl <sub>3</sub> into a TiO <sub>2</sub> @C matrix and calcining the mixture.                                                                                                                                                                               | 219/500/1000                     | 0.01–3.0<br>V | S56 |
| <b>Sb-N-C</b>                                                                | Antimony-doped hard carbon materials were synthesized by anchoring Sb atoms on nitrogen-doped carbon.                                                                                                                                                                                                                         | 254/1000/2000                    | 0.01–3.0<br>V | S57 |
| <b>Ti<sub>3</sub>C<sub>2</sub>T<sub>x</sub>/Sb<sub>2</sub>Se<sub>3</sub></b> | The Sb <sub>2</sub> Se <sub>3</sub> /Ti <sub>3</sub> C <sub>2</sub> T <sub>x</sub> film was synthesized using electrostatic self-assembly, where the Ti <sub>3</sub> C <sub>2</sub> T <sub>x</sub> MXene nanosheets interacted with the Sb <sub>2</sub> Se <sub>3</sub> nanowires to enhance the electrochemical performance. | 568.9/100/100<br>304.1/1000/500  | 0.01–2.5<br>V | S58 |
| <b>Sb@CN</b>                                                                 | Sb nanoparticles encapsulated in hollow mesoporous N-doped carbon spherical shells were successfully synthesized using a SiO <sub>2</sub> template.                                                                                                                                                                           | 282/660/5000                     | 0.01–3.0<br>V | S59 |
| <b>Sb<sub>2</sub>S<sub>3</sub>/S@S-doped C</b>                               | The Sb <sub>2</sub> S <sub>3</sub> /S@S-doped carbon composite with a hollow core-shell structure was synthesized using a template method combined with a complexation reaction.                                                                                                                                              | 479/2000/100                     | 0.01–3.0<br>V | S60 |
| <b>FeSb<sub>2</sub>S<sub>4</sub>/Sb/rGO</b>                                  | FeSb <sub>2</sub> S <sub>4</sub> /Sb/rGO composite was synthesized by combining FeSb <sub>2</sub> S <sub>4</sub> with Sb and rGO, then forming 3D discs using CNTs and rGO for conductivity.                                                                                                                                  | 252.7/1000/100                   | 0.01–2.5<br>V | S61 |
| <b>NF–Sb<sub>2</sub>S<sub>3</sub>@rGO</b>                                    | Sb <sub>2</sub> S <sub>3</sub> @rGO hybrid was synthesized through a hydrothermal method, creating a 3D Sb <sub>2</sub> S <sub>3</sub> nanoflower structure coated with reduced graphene oxide (rGO).                                                                                                                         | 459/100/200                      | 0.01–2.5<br>V | S62 |
| <b>MoS<sub>2</sub>@Sb<sub>2</sub>S<sub>3</sub>/rGO</b>                       | The MoS <sub>2</sub> @Sb <sub>2</sub> S <sub>3</sub> /rGO composites were prepared by combining MoS <sub>2</sub> and Sb <sub>2</sub> S <sub>3</sub> in a heterostructure and wrapping them with 3D interconnected rGO networks.                                                                                               | 162.1/5000/1100                  | 0.01–3.0<br>V | S63 |



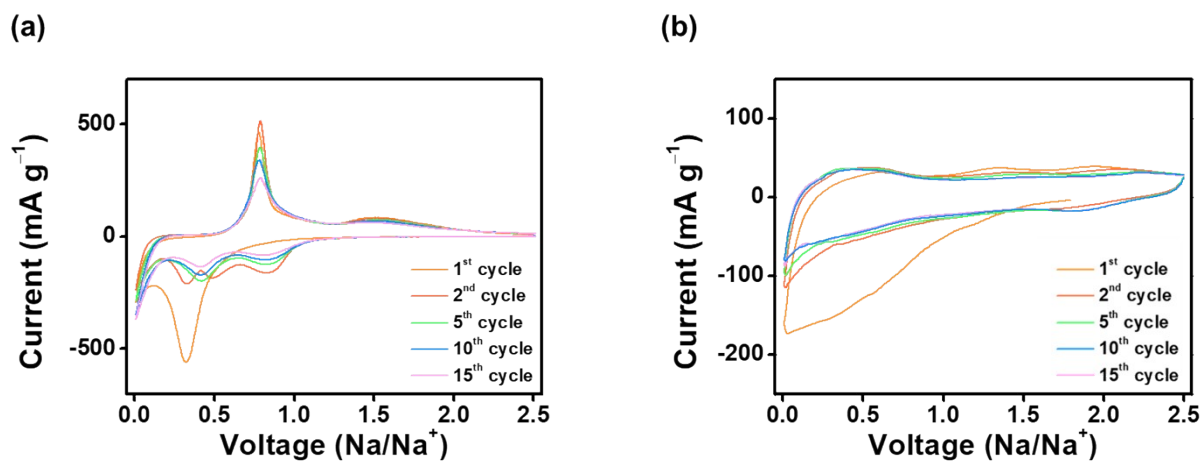

**Fig. S22.** CV profiles of (a) the bare Sb<sub>2</sub>O<sub>3</sub> and (b) MrGO electrodes at a scan rate of 0.1 mV s<sup>-1</sup>.

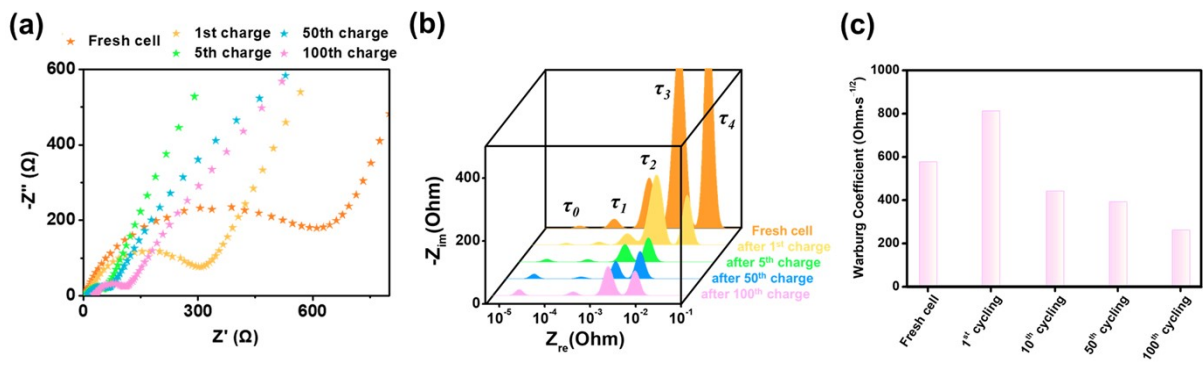

**Fig. S23.** (a) Nyquist plot and (b) DRT plot of the bare  $Sb_2O_3$  electrode in SIBs measured up to the 100<sup>th</sup> cycle; (c) Warburg coefficients.

**Table S8.** Impedance parameters fitted using the equivalent circuit model in **Fig. 9g**;  $R_s$  ( $\Omega$ );  $R_f$  ( $\Omega$ );  $R_{ct}$  ( $\Omega$ );  $R_{ion}$  ( $\Omega$ ).

|                               | MrGO/Sb <sub>2</sub> O <sub>3</sub> |       |          |           | PS-MrGO/Na <sub>x</sub> Sb <sub>2</sub> O <sub>3</sub> |       |          |           |
|-------------------------------|-------------------------------------|-------|----------|-----------|--------------------------------------------------------|-------|----------|-----------|
|                               | $R_s$                               | $R_f$ | $R_{ct}$ | $R_{ion}$ | $R_s$                                                  | $R_f$ | $R_{ct}$ | $R_{ion}$ |
| <b>Fresh cell</b>             | 7.8                                 | 24.5  | 175.1    | -         | 5.7                                                    | 22.9  | 120.5    | -         |
| <b>1<sup>st</sup> cycle</b>   | 8.9                                 | 28.8  | 180.6    | -         | 4.6                                                    | 16.6  | 108.1    | -         |
| <b>5<sup>th</sup> cycle</b>   | 8.7                                 | 30.4  | 155.8    | -         | 6.2                                                    | 19.4  | 92.3     | -         |
| <b>50<sup>th</sup> cycle</b>  | 11.1                                | 27.3  | 156.7    | -         | 8.5                                                    | 14.8  | 88.7     | -         |
| <b>100<sup>th</sup> cycle</b> | 10.5                                | 24.8  | 89.6     | -         | 6.6                                                    | 13.2  | 84.8     | -         |
|                               | MrGO                                |       |          |           | bare Sb <sub>2</sub> O <sub>3</sub>                    |       |          |           |
|                               | $R_s$                               | $R_f$ | $R_{ct}$ | $R_{ion}$ | $R_s$                                                  | $R_f$ | $R_{ct}$ | $R_{ion}$ |
| <b>Fresh cell</b>             | 10.2                                | 32.9  | 305.3    | 199.6     | 6.7                                                    | 28.2  | 342.8    | 251.6     |
| <b>1<sup>st</sup> cycle</b>   | 12.3                                | 34.2  | 238.6    | 94.1      | 13.8                                                   | 56.5  | 230.9    | 88.4      |
| <b>5<sup>th</sup> cycle</b>   | 11.6                                | 38.7  | 207.3    | -         | 6.2                                                    | 152.5 | 165.7    | -         |
| <b>50<sup>th</sup> cycle</b>  | 13.8                                | 38.9  | 183.8    | -         | 8.9                                                    | 87.9  | 137.6    | -         |
| <b>100<sup>th</sup> cycle</b> | 13.6                                | 41.5  | 172.6    | -         | 26.2                                                   | 85.1  | 151.0    | -         |

## Supplementary References

- S1. Z. Li, Y. Gao, S. Xiong, S. Wang, L. Hou, J. Zhang and F. Gao, *J. Alloys Compd.*, 2024, **1002**, 175308.
- S2. A. D. Singh, A. A. Cyril, A. Dey, G. Varshney and S. Sengupta, *J. Alloys Compd.*, 2024, **977**, 173305.
- S3. U. Ray, D. Das, S. Jena, A. Mitra, K. Das, S. B. Majumder and S. Das, *J. Power Sources*, 2024, **594**, 234044.
- S4. L. Zhai, H. Li, J. Wu, J. Luo, J.-M. Yu, Z. Pan, H. Li, B. Hu, B. Zheng and W.-W. Xiong, *ACS Appl. Mater. Interfaces*, 2024, **16**, 35024–35032.
- S5. Z. Wu, H. Li, L. Fang, J. Li, W. Shi, T. Xu, X. Wang, L. Chang and P. Nie, *Electrochim. Acta*, 2024, **475**, 143613.
- S6. Z.-Z. Yang, C.-Y. Zhang, Y.-Q. Ou, Z.-K. Su, Y. Zhao, H.-J. Cong, X.-P. Ai and J.-F. Qian, *Rare Metals*, 2024, **43**, 2039–2052.
- S7. Y. Li, Y.-H. Zhao, L.-L. Zhao, P.-F. Wang, Y. Xie and T.-F. Yi, *Rare Metals*, 2024, **43**, 2994–3006.
- S8. J.-G. Deng, H.-Q. Feng, Y.-L. Xu, S.-G. Guo, J.-P. Li, K.-F. Huo, J.-J. Fu, B. Gao and P.-K. Chu, *Rare Metals*, 2024, **43**, 4234–4242.
- S9. Z. Bo, Z. Zheng, Y. Huang, P. Chen, J. Yan, K. Cen, R. Mo, H. Yang and K. (Ken) Ostrikov, *Chem. Eng. J.*, 2024, **485**, 149837.
- S10. X. Zhou, X. Zheng, H. Lu, H. Deng, Z. Liu and J. Deng, *J. Energy Storage*, 2024, **92**, 111999.
- S11. L. Feng, J. Chen, Y. Li, S. Zhou, R. A. Soomro, P. Zhang and B. Xu, *Chem. Eng. J.*, 2024, **489**, 151396.
- S12. Y. Jin, H. Hwang, H. Seong, J. H. Moon, G. Kim, H. Yoo, T. Jung, J. B. Lee and J. Choi, *ACS Appl. Energy Mater.*, 2024, **7**, 2955–2962.
- S13. Y. Xiang, X. Hu, X. Zhong, W. Deng, G. Zou, H. Hou and X. Ji, *Adv. Funct. Mater.*, 2024, **7**, 2311478.
- S14. H. Yin, G. Zhan, R. Yan, X. Wu, Q. Hu and X. Huang, *Dalton Trans.*, 2024, **53**, 7142–7151.
- S15. J. Chen, M. Tang, G. Wang, L. Liu, X. Hu, H. Liao and X. Hu, *Mater. Lett.*, 2024, **354**, 135346.
- S16. U. Ray, D. Das, A. Mitra, S. B. Majumder and S. Das, *Mater. Lett.*, 2024, **355**, 135567.
- S17. K. Gomez, E. Fletes, J. G. Parsons and M. Alcoutlabi, *Appl. Sci.*, 2024, **14**, 6598.
- S18. X. Zhou, A. Wang, X. Zheng, D. Sun and Y. Yang, *Inorg. Chem. Front.*, 2024, **11**, 4167–4178.
- S19. Q. Zhang, H. Wang, T. Yao, X. Lu, C. Li, Y. Qiu, P. Zhang, D. Wang, Y. Chen and L. Meng, *Small*, 2024, **20**, 2400468.
- S20. J. Tang, L. Liu, J. Sun, Y. Ran, Y. Zheng, J. Chai, L. Wang and Z. Liu, *J. Alloys Compd.*, 2024, **989**, 174379.
- S21. X. Chen, T. Yao, H. Dong, Q. Ge, S. Chen and Z. Ma, *Energy Fuels*, 2023, **37**, 5586–5594.
- S22. M. Su, J. Li, K. He, K. Fu, P. Nui, Y. Chen, Y. Zhou, A. Dou, X. Hou and Y. Liu, *J. Colloid Interface Sci.*, 2023, **629**, 83–91.
- S23. C. Weng, S. Huang, T. Lu, J. Li, J. Li, J. Li and L. Pan, *J. Colloid Interface Sci.*, 2023, **652**, 208–217.

- S24. L. Dashairya, V. Chaturvedi, A. Kumar, T. R. Mohanta, M. Shelke and P. Saha, *Solid State Ion.*, 2023, **396**, 116243.
- S25. Y. Xiang, L. Xu, L. Yang, Y. Ye, Z. Ge, J. Wu, W. Deng, G. Zou, H. Hou and X. Ji, *Nanomicro Lett.*, 2022, **14**, 136.
- S26. Y. Zhang, S. Li, L. Liu, Y. Lin, S. Jiang, Y. Li, X. Ren, P. Zhang, L. Sun and H. Y. Yang, *ACS Appl. Mater. Interfaces*, 2022, **14**, 33064–33075.
- S27. B. Xiao, G. Wu, T. Wang, Z. Wei, Y. Sui, B. Shen, J. Qi, F. Wei, Q. Meng, Y. Ren, X. Xue, J. Zheng, J. Mao, K. Dai and Q. Yan, *Ceram. Int.*, 2022, **48**, 2118–2123.
- S28. Y. Mao, R. Chen, H. You, Y. Liu, S. Luan, L. Hou and F. Gao, *J. Alloys Compd.*, 2022, **904**, 164000.
- S29. Z. Wang, F. Zeng, D. Zhang, Y. Shen, S. Wang, Y. Cheng, C. Li and L. Wang, *Nanomaterials*, 2022, **12**, 2322.
- S30. J. Liu, P. Li, F. Li, Z. Liu, X. Xu and J. Liu, *Batteries*, 2022, **8**, 245.
- S31. Y. Gu, R. C. Cui, G. Y. Wang, C. C. Yang and Q. Jiang, *Energy Technol.*, 2022, **10**, 2200746.
- S32. Y. Du, F. Liu, L. Jiang, M. Jia and Z. Zhang, *J. Alloys Compd.*, 2022, **907**, 164469.
- S33. L. Jiang, W. Yin, C. He, T. Luo, Y. Rui and B. Tang, *Colloids Surf. A Physicochem. Eng. Asp.*, 2022, **644**, 128843.
- S34. W. Zhao, S. Lei, J. Li, F. Jiang, T. Wu, Y. Yang, W. Sun, X. Ji and P. Ge, *Adv. Energy Mater.*, 2024, **14**, 2304431.
- S35. H. Gao, W. Gao and M. Pumera, *Adv. Funct. Mater.*, 2024, **34**, 2310563.
- S36. X. Chen, Y. Huang, M. Zhang, Y. Yu, X. Li, D. Chen, J. Hong, S. Du and X. Guan, *Mater. Res. Express*, 2024, **11**, 035501.
- S37. A. F. Hernández-Pascacio, R. E. Castellanos-Pineda, M. Laguna-Estrada and O. A. Jaramillo-Quintero, *Ceram. Int.*, 2024, **50**, 48183–48190.
- S38. J. Płotek, A. Kulka, A. Maximenko, Ł. Kondracki, S. Trabesinger, M. Moździerz, P. Czaja and J. Molenda, *Energy Storage Mater.*, 2024, **72**, 103780.
- S39. M. Chen, X. Han, X. Zheng, H. Shen, J. Wang, J. You, L. Yan, X. Meng, Q. Kang, Q. Wu, Y. Zhao and T. Ma, *Electrochim. Acta*, 2024, **478**, 143867.
- S40. X. Zhou, A. Wang, X. Zheng, Z. Zhang, J. Song, H. Deng, P. Yan, D. Sun, Y. Yang and Z. Lei, *Appl. Surf. Sci.*, 2024, **648**, 159077.
- S41. Y. Liang, Z. Wang, Z. Xu, S. Li, H. Luo, C. Xu and X. Cui, *Appl. Surf. Sci.*, 2024, **651**, 159234.
- S42. Z. Yang, Y. Lu, R. Wang, X. Wang, X. Hao, Z. Zhu, L. Dai, M. Fan, T. Ma and Q. Kang, *Colloids Surf. A Physicochem. Eng. Asp.*, 2024, **694**, 134116.
- S43. A. Xu, M. Huang, C. Liu, T. Li, X. Li, S. Wu, Z. Xu and Y. Yan, *Adv. Funct. Mater.*, 2024, **34**, 2400302.
- S44. C. Yu, B. Liu, M. Li and X. Ding, *Ionics*, 2024, **30**, 1403–1412.
- S45. G. Ma, C. Xu, D. Zhang, S. Che, Y. Wang, J. Yang, K. Chen, Y. Sun, S. Liu, J. Fu, Z. Zhou, Y. Qu, C. Ding and Y. Li, *J. Colloid Interface Sci.*, 2024, **673**, 26–36.
- S46. C.-H. Wu, S. Kubendhiran, R.-J. Chung, C. Kongvarhodom, S. Husain, S. Yougbaré, H.-M. Chen, Y.-F. Wu and L.-Y. Lin, *J. Power Sources*, 2024, **623**, 235469.
- S47. S. Ghosh, V. K. Kumar, S. Bhowmik and S. K. Martha, *J. Energy Storage*, 2024, **86**, 111090.
- S48. X. Li, L. Zeng, W. Lai, Z. Lei, M. Ge, C. Fang, B. Weng, Q. Chen, M. Wei and Q. Qian, *Energy Fuels*, 2024, **38**, 16966–16975.

- S49. T. Zhang, W. Zhang, D. Tang and Z. Zhao, *Inorg. Chem. Commun.*, 2024, **162**, 112159.
- S50. Y. Liu, X. Liu, X. Wang, S. Ullah, Y. Peng, G. Pan, W. Gao, B. Song, X. Zhang, A. Jia, J. Wang, J. He and Y. Wu, *Adv. Funct. Mater.*, 2024, 2415092.
- S51. J. Chen, S. Zhao, W. Meng, M. Guo, G. Wang, C. Guo, Z. Bai, Z. Li, J. Ye, H. Song and X. Wang, *Batteries*, 2023, **9**, 98.
- S52. J. Wu, G. Wang, W. Zhang, L. Wang, J. Peng, Q. Li, Z. Liang, W. Fan, J. Wang and S. Huang, *J. Energy Chem.*, 2024, **90**, 110–119.
- S53. Y. Liu, Y. Qing, B. Zhou, L. Wang, B. Pu, X. Zhou, Y. Wang, M. Zhang, J. Bai, Q. Tang and W. Yang, *ACS Nano*, 2023, **17**, 2431–2439.
- S54. Z. Song, G. Wang, Y. Chen, Y. Lu and Z. Wen, *Chem. Eng. J.*, 2023, **463**, 142289.
- S55. W. Ma, B. Yu, F. Tan, H. Gao and Z. Zhang, *Materials*, 2023, **16**, 2189.
- S56. T. Yao, L. Li and H. Wang, *Chin. Chem. Lett.*, 2023, **34**, 108186.
- S57. Y. Tong, Y. Wu, X. Liu, Z. Chen and H. Li, *J. Colloid Interface Sci.*, 2023, **648**, 575–584.
- S58. J. Yang, J. Li, J. Lu, X. Sheng, Y. Liu, T. Wang and C. Wang, *J. Colloid Interface Sci.*, 2023, **649**, 234–244.
- S59. Q. Mao, Y. Jia, W. Zhu and L. Gao, *J. Solid State Electrochem.*, 2023, **27**, 1433–1441.
- S60. K. Li, L. Yue, J. Hu, X. Zhou, M. Xiao, C. Dai, C. Tian, Y. Yue, W. Zhang and J. Zhang, *Appl. Surf. Sci.*, 2023, **613**, 156111.
- S61. D. Feng, S. Tang, H. Xu and T. Zeng, *J. Alloys Compd.*, 2023, **931**, 167576.
- S62. J. Zhou, Y. Ding, Q. Dou, H. Li, R. Wang, D. Zhang and Y. Cao, *Mater. Chem. Phys.*, 2023, **303**, 127837.
- S63. M. Zhu, J. Li, X. Yang, X. Li, L. Wang and W. Lü, *Appl. Surf. Sci.*, 2023, **624**, 157106.
